# Supplementary material for: Luminescent carbene–copper(i)–amide polymers for efficient host-free solution-processed OLEDs
Source: Royal Society of Chemistry journal article supplement (doi:10.1039/d4sc01865f), 2024-01-01
Supplement: d4sc01865f1.pdf [file d4sc01865f1.pdf]

## **Electronic Supplementary Information**

### **Luminescent Carbene-Copper(I)-Amide Polymers for Efficient Host-Free Solution-Processed OLEDs**

Yao Tan, Ao Ying, Jianlong Xie, Guohua Xie and Shaolong Gong\*

College of Chemistry and Molecular Sciences, Hubei Key Lab on Organic and Polymeric Optoelectronic Materials,

Wuhan University, Wuhan 430072, China.

E-mail: slgong@whu.edu.cn

## General information

All reagents were used as received from commercial sources unless otherwise stated. Tetrahydrofuran and toluene were dried by sodium-potassium alloy.  $^1\text{H}$  NMR and  $^{13}\text{C}$  NMR spectra were measured on a Bruker Advanced II (400 MHz) spectrometer. High-resolution mass spectra (HRMS) were measured on a LCQ-Orbitrap Elite (Thermo-Fisher Scientific, Waltham, MA, USA) mass spectrometer. The number ( $M_n$ ) and weight ( $M_w$ ) average molecular weight, and polydispersity index (PDI) were determined by a Waters 2695 GPC system, using THF as the eluent ( $1.0\text{ mL min}^{-1}$ ). Root-mean-square roughness of surface in neat films were measured by a SPM-9700HT atomic force microscope. The content of Cu element in the Cu(I) polymers were determined by an inductively coupled plasma-atomic emission spectroscopy (Agilent 5110).

## Theoretical calculation

Density functional theory (DFT) and time-dependent DFT (TD-DFT) simulations were performed using Gaussian 16 programs. Ground state structures and FMOs were obtained by B3LYP density functional method with basis set def2-SVP. The dispersion correction was conducted by Grimme's D3 version.<sup>1,2</sup> Time-dependent DFT with PBE0 functional and basis set def2-SVP were then performed to further analyze the excited states with the optimized ground state structures.<sup>3</sup>

## Photophysical characterization

Thin films for photophysical characterization were prepared by spin-coating on quartz substrates using  $10\text{ mg mL}^{-1}$  chlorobenzene solution. Absorption spectra were characterized by a UV-visible spectrophotometer (UV-2700, Shimadzu). Photoluminescence (PL) and phosphorescence spectra were characterized by a spectrofluorimeter (F-4600, Hitachi Inc.). Phosphorescence spectra of thin films were measured at 77 K (the liquid nitrogen temperature). Absolute photoluminescence quantum efficiencies ( $\Phi_{\text{PL}}$ ) of these polymers in neat films were determined using a Hamamatsu's established C9920-02 measurement system (Hamamatsu Photonics) equipped with a calibrated integrating sphere, a xenon lamp, and a model C10027-01 photonic multichannel analyzer. During the  $\Phi_{\text{PL}}$  measurements, the integrating sphere was purged with pure and dry nitrogen to keep the environment inert. The selected monochromatic excitation light was used to excite samples placed in the calibrated integrating sphere. Time-resolved PL (PL decay curves) was measured by monitoring the decay of the intensity at the PL peak wavelength using a FluoTime 300 Spectrometer (PicoQuant) with a Picosecond Pulsed UV-LASTER (LASTER375) as the excitation source. No light filter was used. For temperature-dependent spectra and TRPL measurements, the samples were placed in a vacuum cryostat chamber with a temperature control. The solution samples were bubbled with argon for 20 minutes before TRPL measurement.

## Quantitative analyses of the corresponding rate constants

Temperature-dependent lifetimes were fitted by Boltzmann type equation (eq. S1), where  $k_{r,S}$  and  $k_{r,T}$  are the rate constants for radiative decay from the  $S_1$  and  $T_1$  states, respectively,  $K_B$  is Boltzmann's constant, and T is temperature.<sup>4</sup>

$$\tau = \frac{3 + \exp\left(-\frac{\Delta E_{ST}}{k_B T}\right)}{3k_{r,T} + k_{r,S} \exp\left(-\frac{\Delta E_{ST}}{k_B T}\right)} \quad (S1)$$

The  $\Delta E_{ST}$ s were calculated by Arrhenius plot (eq. S2), where  $k_{ISC}$  and  $k_{RISC}$  represent the intersystem crossing (ISC) rate constant, the reverse intersystem crossing (RISC) rate constant, respectively. Based on eq. S2, the Arrhenius plot shows a linear dependence of  $\ln k_{TADF}$  as a function of  $1/T$  with a slope of  $\Delta E_{ST}/k_B$ .<sup>6</sup>

$$\ln k_{TADF} = \ln\left(\frac{k_{ISC}}{3} \left(1 - \frac{k_{RISC}}{k_{ff} + k_{ISC}}\right)\right) - \frac{\Delta E_{ST}}{k_B T} = \ln b - \frac{\Delta E_{ST}}{k_B T} \quad (S2)$$

## Device fabrication and measurement

The pre-patterned indium tin oxide (ITO) substrates were consecutively cleaned by acetone and ethanol in an ultrasonic bath. Afterwards, the substrates were dried with  $N_2$  and then loaded into a UV-Ozone chamber. After UV-Ozone treatment, a layer of PEDOT:PSS was spin-coated on the ITO substrate as the hole-injecting layer, and then annealed at 120 °C for 10 min inside a  $N_2$ -filled glove-box. The neat emitter layer was spin-coated directly onto the hole-injecting layer from the chlorobenzene solvent (10 mg/mL), and then annealed at 50 °C for 10 min. Afterwards, the hole-blocking layer, the electron-transporting layer, and the cathode were consecutively thermally evaporated onto the emitter layer in a vacuum chamber. Before taken out of the glove-box, the devices were encapsulated with UV-curable epoxy. The voltage-current-luminance characteristics and the EL spectra were simultaneously measured with PR735 SpectraScan Photometer and Keithley 2400 sourcemeter unit under ambient atmosphere at room temperature.

## Synthesis routes

All reagents were used as received from commercial sources unless otherwise stated. The key precursors CAAC-CuCl and MAC-CuCl were synthesized according to the reported literature procedures.<sup>5,6</sup>

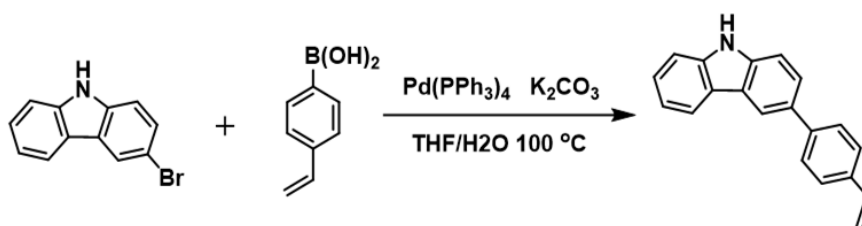

**Scheme S1** Synthetic route of the donor ligand.

**3-(4-vinylphenyl)-9H-carbazole:** 3-Bromo-9H-carbazole (1.0 g, 4 mmol), (4-vinylphenyl)boronic acid (720 mg, 4.8 mmol), Pd(PPh<sub>3</sub>)<sub>4</sub> (234 mg, 0.2 mmol) and K<sub>2</sub>CO<sub>3</sub> (1.1 g, 8 mmol) were added to THF (12 mL) and H<sub>2</sub>O (4 mL) mixing solutions. The reaction was stirred at 100 °C overnight. The reaction mixture was extracted with CH<sub>2</sub>Cl<sub>2</sub> and washed with water. The organic phase was dried over anhydrous Na<sub>2</sub>SO<sub>4</sub> and concentrated under reduced pressure. The crude product was purified by column chromatography with petroleum ether/CH<sub>2</sub>Cl<sub>2</sub> (v/v = 2:1) as eluent, finally the white powder (861 mg, 3.3 mmol). Yield: 81%. <sup>1</sup>H NMR (400 MHz, CDCl<sub>3</sub>+TMS, 300 K, ppm) δ = 8.15 (d, *J* = 7.7 Hz, 2H), 7.68–7.61 (m, 2H), 7.59–7.50 (m, 2H), 7.45–7.38 (m, 4H), 7.32–7.26 (m, 2H), 6.83 (dd, *J* = 17.6, 10.9 Hz, 1H), 5.86 (d, *J* = 17.6 Hz, 1H), 5.37 (d, *J* = 11.7 Hz, 1H). <sup>13</sup>C NMR (101 MHz, CDCl<sub>3</sub>+TMS, 300 K, ppm) δ = 141.5, 140.0, 139.0, 136.6, 135.8, 132.6, 127.3, 126.7, 126.1, 125.3, 124.0, 123.5, 120.4, 119.7, 118.7, 113.5, 110.8, 110.8.

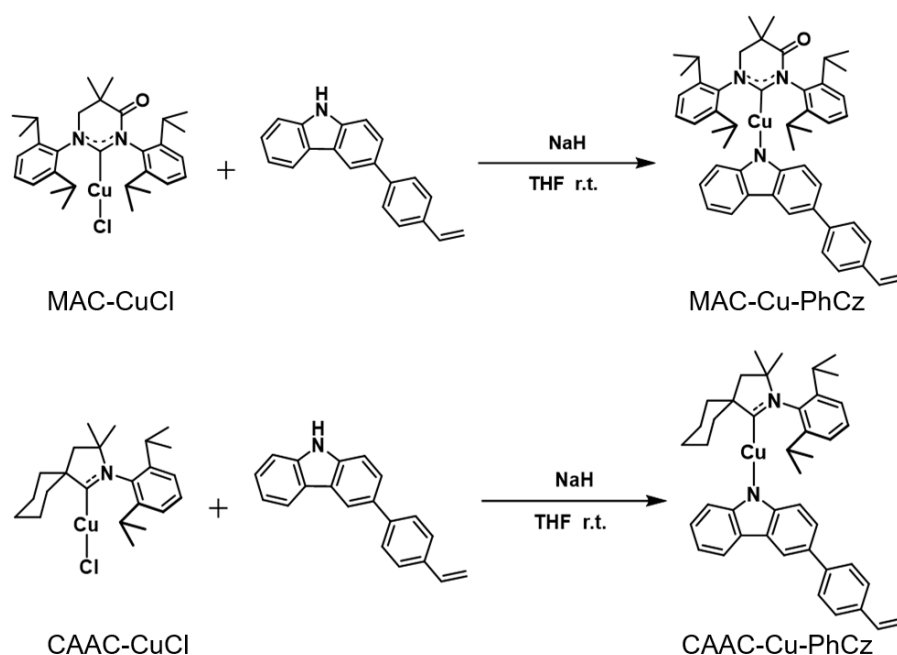

**Scheme S2** Synthetic routes of the Cu(I)-CMA monomers.

**MAC-Cu-PhCz monomer:** 3-(4-Vinylphenyl)-9H-carbazole (511 mg, 1.9 mmol) and NaH (54 mg, 2.3 mmol) were dissolved in 10 mL THF and stirred at 0.5 h at 40 °C. MAC-CuCl (1.0 g, 1.9 mmol) was added to the reaction and stirred for 3 h. the resulting mixture was filtered through Celite, and the solvent was removed under reduced pressure to afford a yellow solid. The rude solid was redissolved in dry CH<sub>2</sub>Cl<sub>2</sub>, and dry hexane was added to precipitate the pure product (1.1 g, 1.4 mmol). Yield: 74%.

$^1\text{H}$  NMR (400 MHz,  $\text{CD}_2\text{Cl}_2+\text{TMS}$ , 300 K, ppm)  $\delta$  = 7.98 (s, 1H), 7.74 (d,  $J$  = 6.9 Hz, 1H), 7.67 (td,  $J$  = 7.8, 5.4 Hz, 2H), 7.54 (d,  $J$  = 8.3 Hz, 2H), 7.48–7.32 (m, 6H), 7.09 (dd,  $J$  = 8.5, 2.0 Hz, 1H), 6.84–6.77 (m, 1H), 6.76–6.70 (m, 1H), 6.70–6.63 (m, 1H), 5.69 (d,  $J$  = 17.6 Hz, 1H), 5.46–5.39 (m, 2H), 5.13 (d,  $J$  = 11.8 Hz, 1H), 3.84 (s, 2H), 3.26 (m, 2H), 3.02 (m, 2H), 1.53 (s, 8 Hz), 1.34 (d,  $J$  = 6.8 Hz, 6H), 1.18 (t,  $J$  = 6.9 Hz, 16H).  $^{13}\text{C}$  NMR (101 MHz,  $\text{CD}_2\text{Cl}_2+\text{TMS}$ , 300 K, ppm)  $\delta$  = 210.4, 171.1, 150.4, 149.5, 146.3, 145.3, 142.7, 140.1, 136.7, 136.0, 134.6, 130.6, 130.3, 127.6, 126.6, 126.4, 125.8, 125.0, 124.3, 124.0, 123.3, 122.3, 118.9, 117.1, 115.6, 114.7, 114.7, 112.3, 61.9, 38.0, 29.2, 28.9, 24.1, 23.9, 23.8. Elemental analysis calcd. for  $\text{C}_{50}\text{H}_{56}\text{N}_3\text{OCu}$ : C, 77.18%; H, 7.20%; N, 5.40%. Found: C, 76.98%; H, 7.31%; N, 5.28%.

**CAAC-Cu-PhCz monomer:** 3-(4-Vinylphenyl)-9H-carbazole (511 mg, 1.9 mmol) and NaH (54 mg, 2.3 mmol) were dissolved in 10 mL THF and stirred at 0.5 h at 40 °C. CAAC-CuCl (806 mg, 1.9 mmol) was added to the reaction and stirred for 3 h. The resulting mixture was filtered through Celite, and the solvent was removed under reduced pressure to afford a white solid. The crude solid was redissolved in dry  $\text{CH}_2\text{Cl}_2$ , and dry hexane was added to precipitate the pure product (1.0 g, 1.6 mmol). Yield: 83%.  $^1\text{H}$  NMR (400 MHz,  $\text{CD}_2\text{Cl}_2+\text{TMS}$ , 300 K, ppm)  $\delta$  = 8.23 (d,  $J$  = 1.9 Hz, 1H), 8.01 (d,  $J$  = 7.6 Hz, 1H), 7.78–7.66 (m, 3H), 7.52 (dd,  $J$  = 8.0, 2.9 Hz, 4H), 7.42 (dd,  $J$  = 8.5, 2.0 Hz, 1H), 7.15 (t,  $J$  = 8.2 Hz, 1H), 6.97 (t,  $J$  = 7.0 Hz, 1H), 6.88–6.75 (m, 2H), 6.67 (d,  $J$  = 8.5 Hz, 1H), 5.82 (d,  $J$  = 18.6 Hz, 1H), 5.27 (d,  $J$  = 11.5 Hz, 1H), 3.03 (hept,  $J$  = 6.8 Hz, 2H), 2.49–2.33 (m, 2H), 2.24 (s, 2H), 2.11 (m, 2H), 1.91 (m, 1H), 1.83–1.62 (m, 5H), 1.50 (s, 6H), 1.39 (d,  $J$  = 6.8 Hz, 6H), 1.27 (d,  $J$  = 6.7 Hz, 6H).  $^{13}\text{C}$  NMR (101 MHz,  $\text{CD}_2\text{Cl}_2+\text{TMS}$ , 300 K, ppm)  $\delta$  = 250.5, 150.6, 149.7, 145.8, 142.7, 136.7, 135.3, 134.7, 129.7, 127.7, 126.6, 126.5, 125.2, 124.6, 124.4, 123.6, 122.6, 119.3, 117.4, 115.7, 114.7, 114.7, 112.4, 80.5, 59.4, 46.4, 36.7, 29.5, 29.2, 26.4, 25.7, 22.4, 22.3. Elemental analysis calcd. for  $\text{C}_{43}\text{H}_{49}\text{NCu}$ : C, 78.75%; H, 7.48%; N, 4.27%. Found: C, 78.62%; H, 7.64%; N, 4.07%.

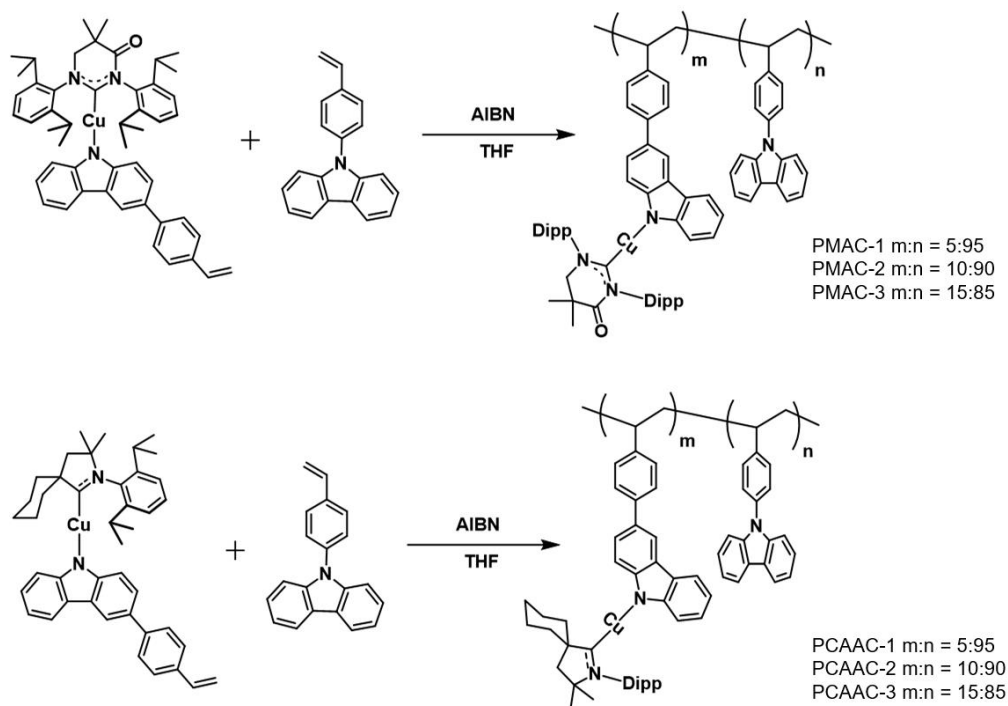

**Scheme S3** Synthetic routes of the Cu(I) polymers.

**Synthetic procedure of the Cu(I) polymers:**

The polymers were synthesized by free radical polymerization with azodiisobutyronitrile (AIBN) as the radical initiator and THF as the solvent. The Cu(I)-CMA complexes monomers and AIBN (1% of the total amount of the monomers) were dissolved in THF at 50 °C for 48 h under nitrogen atmosphere. After cooling to room temperature, the solvent was removed under reduced pressure to afford crude products. The crude solid were boiled in acetone for 3 h and then filtered to afford purified solid.

**PMAC-1:** MAC-Cu-PhCz (150 mg, 0.2 mmol), 9-(4-vinylphenyl)-9H-carbazole (980 mg, 3.8 mmol) and AIBN (7 mg, 0.04 mmol) were used in the free radical polymerization. Yield: 87%. <sup>1</sup>H NMR (400 MHz, CD<sub>2</sub>Cl<sub>2</sub>+TMS, 300 K, ppm) δ = 8.21–7.75 (bs), 7.65–6.40 (br), 3.97–3.64 (br), 3.38–2.81 (br), 2.75–1.66 (br), 1.43–0.98 (br). <sup>13</sup>C NMR (101 MHz, CD<sub>2</sub>Cl<sub>2</sub>+TMS, 300 K, ppm) δ = 170.6, 143.9, 140.4, 135.5, 129.0, 126.4, 125.7, 123.1, 120.0, 119.7, 109.3, 40.8, 37.7, 29.0, 28.7, 25.5, 24.49, 24.01, 23.75, 13.8. Elemental analysis. Found: C, 87.20%; N, 4.68%; H, 6.15%. GPC: M<sub>n</sub>: 56.4 kDa, M<sub>w</sub>: 116.8 kDa, PDI: 2.07.

**PMAC-2:** MAC-Cu-PhCz (300 mg, 0.4 mmol), 9-(4-vinylphenyl)-9H-carbazole (928 mg, 3.6 mmol) and AIBN (7 mg, 0.04 mmol)

were used in the free radical polymerization. Yield: 86%.  $^1\text{H}$  NMR (400 MHz,  $\text{CD}_2\text{Cl}_2+\text{TMS}$ , 300 K, ppm)  $\delta$  = 8.06–7.64 (bs), 7.48–6.28 (br), 3.80–3.51 (br), 3.25–2.70 (br), 2.53–1.55(br), 1.32–0.83 (br).  $^{13}\text{C}$  NMR (101 MHz,  $\text{CD}_2\text{Cl}_2+\text{TMS}$ , 300 K, ppm)  $\delta$  = 170.9, 145.5, 144.1, 140.3, 135.4, 128.9, 126.4, 125.7, 125.3, 124.9, 124.5, 123.1, 119.8, 109.3, 40.8, 37.9, 36.2, 33.5, 31.6, 29.0, 28.6, 27.0, 24.6, 24.5, 24.3, 24.0, 23.8, 23.6, 22.7, 22.6, 22.4, 18.5, 13.9, 11.2. Elemental analysis. Found: C, 86.02%; N, 4.64%; H, 6.36%. GPC:  $M_n$ : 40.2 kDa,  $M_w$ : 85.4 kDa, PDI: 2.12.

**PMAC-3:** MAC-Cu-PhCz (450 mg, 0.6 mmol), 9-(4-vinylphenyl)-9H-carbazole (876 mg, 3.6 mmol) and AIBN (7 mg, 0.04 mmol) were used in the free radical polymerization. Yield: 82%.  $^1\text{H}$  NMR (400 MHz,  $\text{CD}_2\text{Cl}_2+\text{TMS}$ , 300 K, ppm)  $\delta$  = 8.21–7.72 (bs), 7.49–6.43 (br), 3.9–3.63 (br), 3.38–2.83 (br), 2.59–1.67(br), 1.43–0.98 (br).  $^{13}\text{C}$  NMR (101 MHz,  $\text{CD}_2\text{Cl}_2+\text{TMS}$ , 300 K, ppm)  $\delta$  = 170.7, 145.5, 144.4, 140.4, 135.5, 129.0, 126.4, 125.7, 125.3, 124.5, 123.2, 120.0, 109.4, 40.8, 37.9, 31.6, 29.2, 29.1, 29.0, 28.6, 26.9, 24.6, 24.5, 24.3, 24.0, 23.8, 23.6, 22.7, 22.6, 22.4, 18.5, 14.0, 11.2. Elemental analysis. Found: C, 83.80%; N, 4.47%; H, 6.51%. GPC:  $M_n$ : 52.1 kDa,  $M_w$ : 114.4 kDa, PDI: 2.19.

**PCAAC-1:** CAAC-Cu-PhCz (131 mg, 0.2 mmol), 9-(4-vinylphenyl)-9H-carbazole (980 mg, 3.8 mmol) and AIBN (7 mg, 0.04 mmol) were used in the free radical polymerization. Yield: 76%.  $^1\text{H}$  NMR (400 MHz,  $\text{CD}_2\text{Cl}_2+\text{TMS}$ , 300 K, ppm)  $\delta$  = 8.08–7.78 (bs), 7.47–6.64 (br), 2.98–2.77 (m), 2.68–1.65 (br).  $^{13}\text{C}$  NMR (101 MHz,  $\text{CD}_2\text{Cl}_2+\text{TMS}$ , 300 K, ppm)  $\delta$  = 167.0, 146.4, 145.7, 142.2, 141.1, 136.5, 131.5, 125.1, 122.5, 121.7, 120.9, 119.2, 115.9, 111.7, 110.5, 105.5, 57.4, 36.8, 33.9, 25.0, 24.7, 20.5, 20.0, 19.78, 9.9. Elemental analysis. Found: C, 86.56%; N, 4.91%; H, 6.16%. GPC:  $M_n$ : 43.3 kDa,  $M_w$ : 90.7 kDa, PDI: 2.10.

**PCAAC-2:** CAAC-Cu-PhCz (262 mg, 0.4 mmol), 9-(4-vinylphenyl)-9H-carbazole (928 mg, 3.6 mmol) and AIBN (7 mg, 0.04 mmol) were used in the free radical polymerization. Yield: 83%.  $^1\text{H}$  NMR (400 MHz,  $\text{CD}_2\text{Cl}_2+\text{TMS}$ , 300 K, ppm)  $\delta$  = 8.10–7.77 (bs), 7.49–6.65 (br), 2.96–2.78 (m), 2.69–1.67 (br).  $^{13}\text{C}$  NMR (101 MHz,  $\text{CD}_2\text{Cl}_2+\text{TMS}$ , 300 K, ppm)  $\delta$  = 140.4, 135.6, 129.0, 128.2, 126.4, 125.7, 123.1, 119.9, 109.4, 40.5, 36.8, 36.129.4, 29.4, 29.1, 26.3, 25.7 22.3, 16.2, 14.1. Elemental analysis. Found: C, 84.98%; N, 4.88%; H, 6.34%. GPC:  $M_n$ : 51.1 kDa,  $M_w$ : 108.1 kDa, PDI: 2.12.

**PCAAC-3:** CAAC-Cu-PhCz (393 mg, 0.6 mmol), 9-(4-vinylphenyl)-9H-carbazole (876 mg, 3.6 mmol) and AIBN (7 mg, 0.04 mmol) were used in the free radical polymerization. Yield: 81%.  $^1\text{H}$  NMR (400 MHz,  $\text{CD}_2\text{Cl}_2+\text{TMS}$ , 300 K, ppm)  $\delta$  = 8.15–7.78 (bs),

7.49–6.50 (br), 2.99–2.74 (m), 2.69–1.67 (br), 1.27–0.99 (br).  $^{13}\text{C}$  NMR (101 MHz,  $\text{CD}_2\text{Cl}_2$ +TMS, 300 K, ppm)  $\delta$  = 140.4, 135.6, 129.0, 128.2, 126.5, 125.7, 123.1, 120.0, 109.4, 60.3, 41.2, 36.5, 36.0, 29.4, 29.0, 26.4, 25.6, 22.3, 20.8, 14.0. Elemental analysis. Found: C, 84.28%; N, 4.85%; H, 6.55%. GPC:  $M_n$ : 29.0 kDa,  $M_w$ : 62.7 kDa, PDI: 2.16.

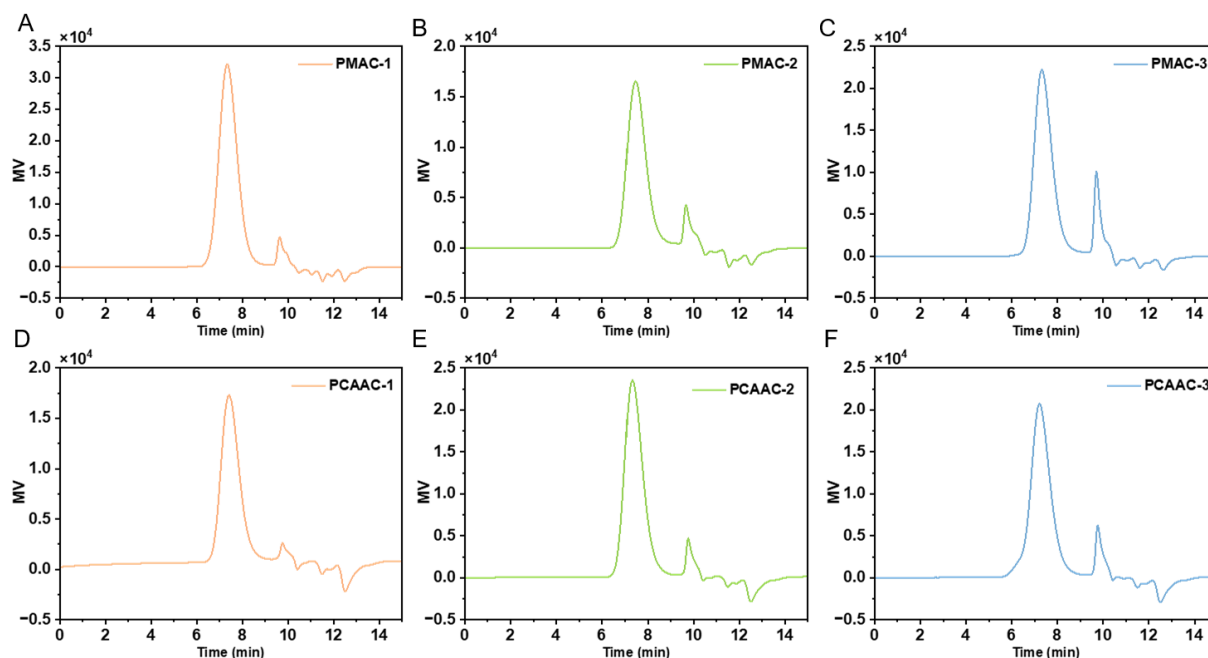

**Fig. S1** GPC chromatograms of all the Cu(I) polymers.

**Table S1.** Characterization Data for all the Cu(I) polymers.

| Polymer | $M_w^a$<br>[kDa] | PDI <sup>a</sup> | $\text{Cu}_{\text{theoretical}}$ [%] | $\text{Cu}_{\text{exp}}^b$<br>[%] | $T_d^c$<br>[°C] | $T_g$<br>[°C] | HOMO <sup>d</sup><br>[eV] | LUMO <sup>e</sup><br>[eV] |
|---------|------------------|------------------|--------------------------------------|-----------------------------------|-----------------|---------------|---------------------------|---------------------------|
| PMAC-1  | 56.4             | 2.07             | 1.1                                  | 0.9                               | 368             | 222           | -5.26                     | -2.75                     |
| PMAC-2  | 40.2             | 2.12             | 2.0                                  | 1.8                               | 359             | 227           | -5.21                     | -2.70                     |
| PMAC-3  | 52.1             | 2.19             | 2.7                                  | 2.7                               | 362             | 235           | -5.29                     | -2.78                     |
| PCAAC-1 | 43.3             | 2.10             | 1.1                                  | 1.0                               | 363             | 217           | -5.41                     | -2.58                     |
| PCAAC-2 | 51.1             | 2.12             | 2.0                                  | 1.7                               | 358             | 221           | -5.44                     | -2.61                     |
| PCAAC-3 | 29.0             | 2.16             | 2.9                                  | 2.8                               | 351             | 211           | -5.41                     | -2.58                     |

<sup>a</sup> Determined by GPC, eluting with THF, by comparison with polystyrene standard. <sup>b</sup> Determined by atomic emission spectroscopy. <sup>c</sup> Temperature at 5% weight loss. <sup>d</sup> Calculated from the onset oxidation potential in  $\text{CH}_2\text{Cl}_2$  solution. <sup>e</sup> Calculated from HOMO and  $E_g$  (the onset of UV-visible spectra in  $\text{CH}_2\text{Cl}_2$  solution).



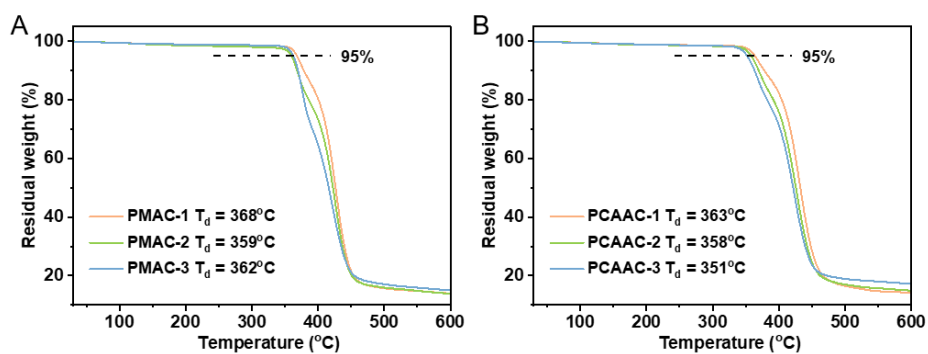

**Fig. S2** TGA traces of all the Cu(I) polymers recorded at a heating rate of 10 °C min<sup>-1</sup>.

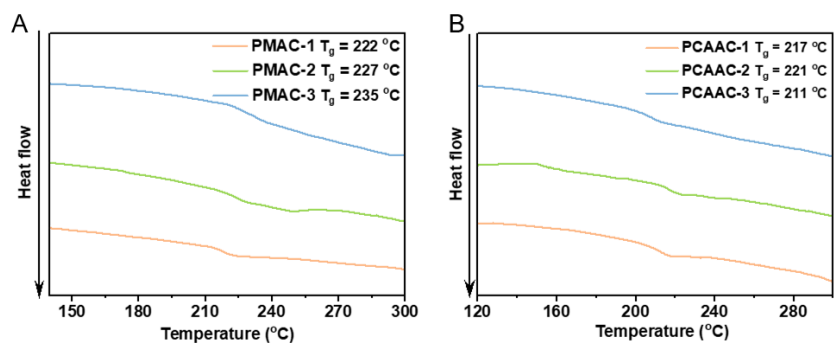

**Fig. S3** DSC traces of all the Cu(I) polymers recorded at a heating rate of 10 °C min<sup>-1</sup>.

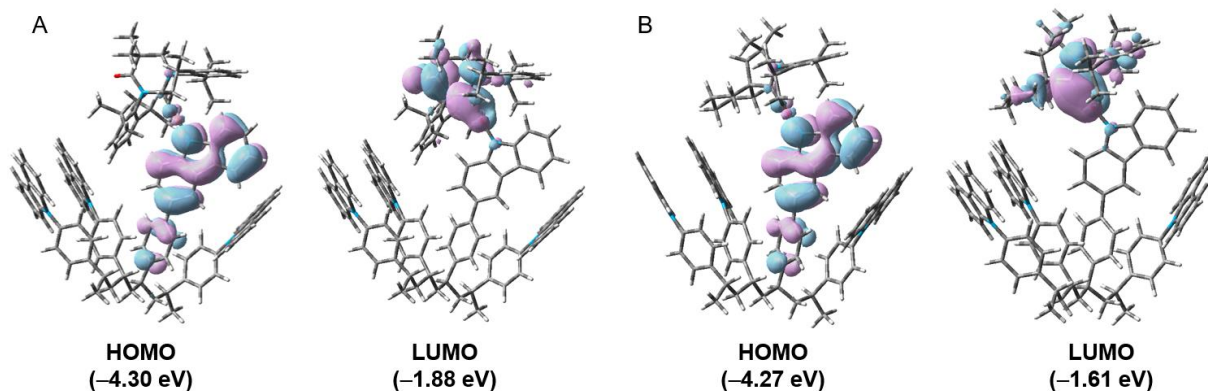

**Fig. S4** Frontier molecular orbital (FMO) separation of (A) PMAC and (B) PCAAC oligomers.

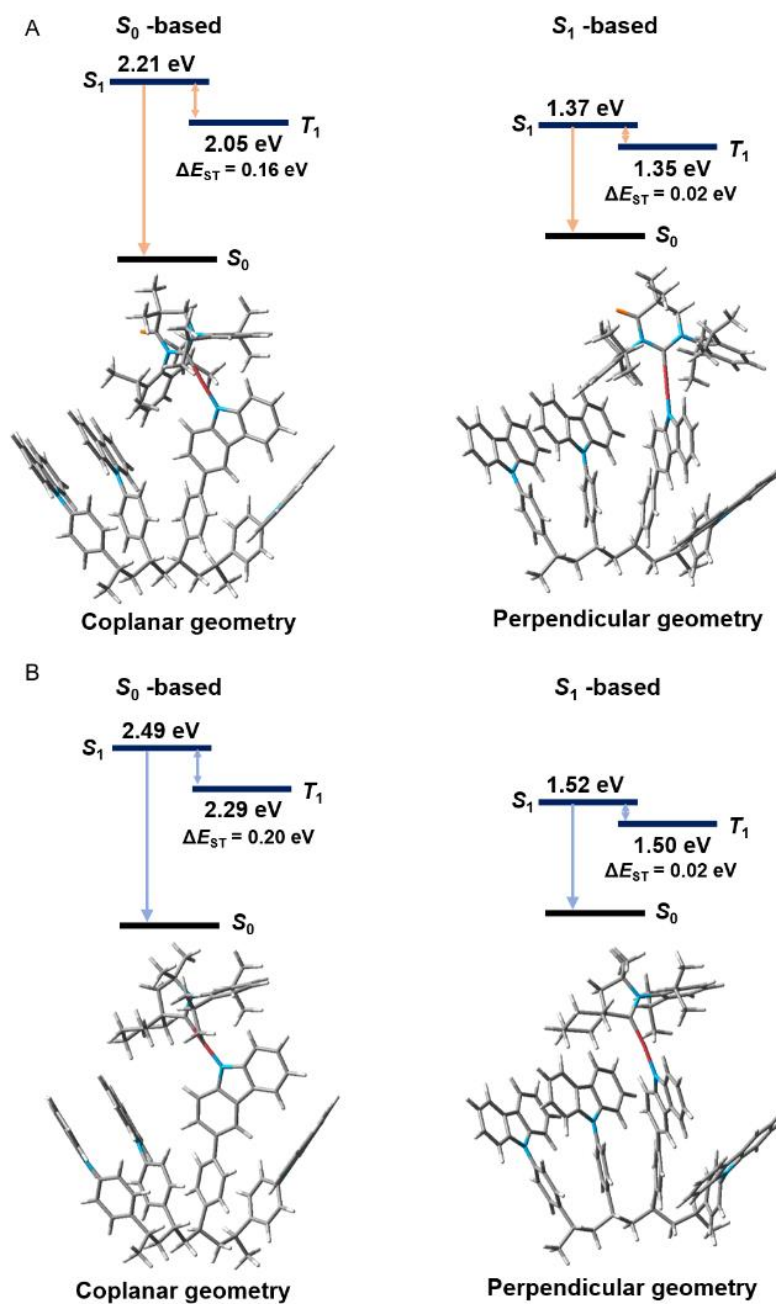

**Fig. S5** Calculated energy levels with the optimized S<sub>0</sub> and S<sub>1</sub> structures of the (A) PMAC and (B) PCAAC oligomers.

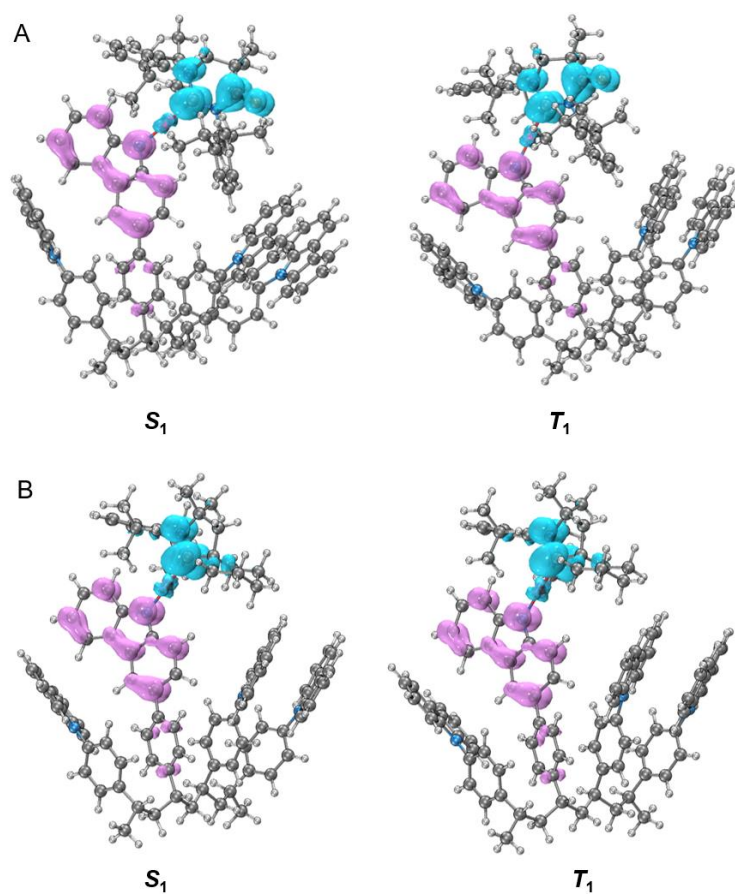

**Fig. S6** hole/electron distributions of  $S_1$  and  $T_1$  excited states for the (A) PMAC and (B) PCAAC oligomers.

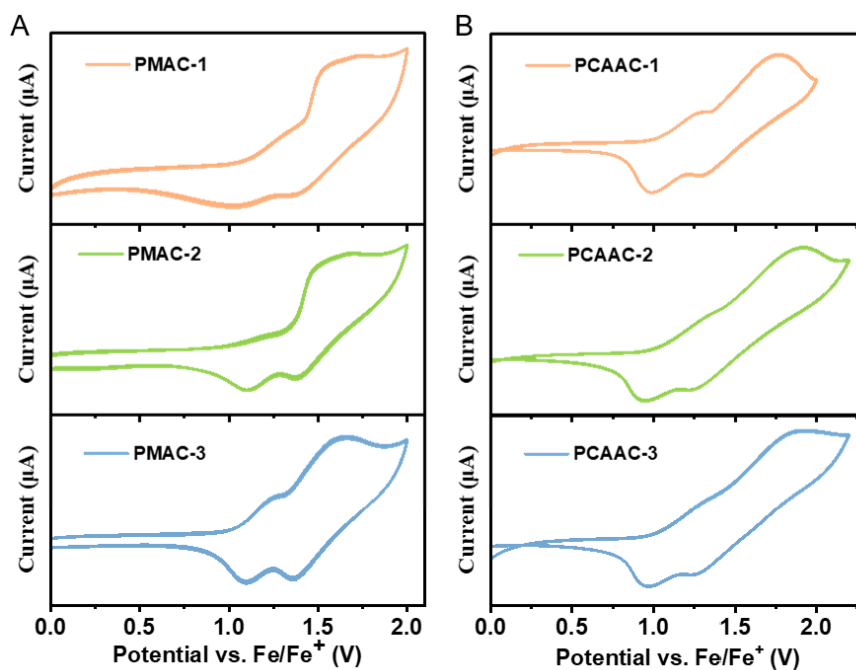

**Fig. S7** Cyclic voltammograms of (A) **PMAC-x** and (B) **PCAAC-x** in  $\text{CH}_2\text{Cl}_2$  solutions.

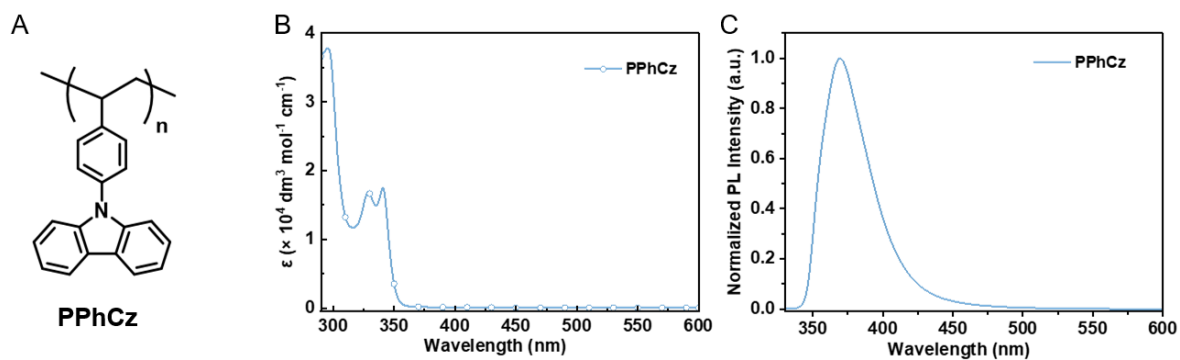

**Fig. S8** (A) The chemical structure of homopolymer PPhCz. (B) UV-visible absorption spectra and (B) normalized PL spectra of PPhCz in toluene solution ( $1 \times 10^{-4} \text{ M}$ , 300 K) under 320 nm excitation.

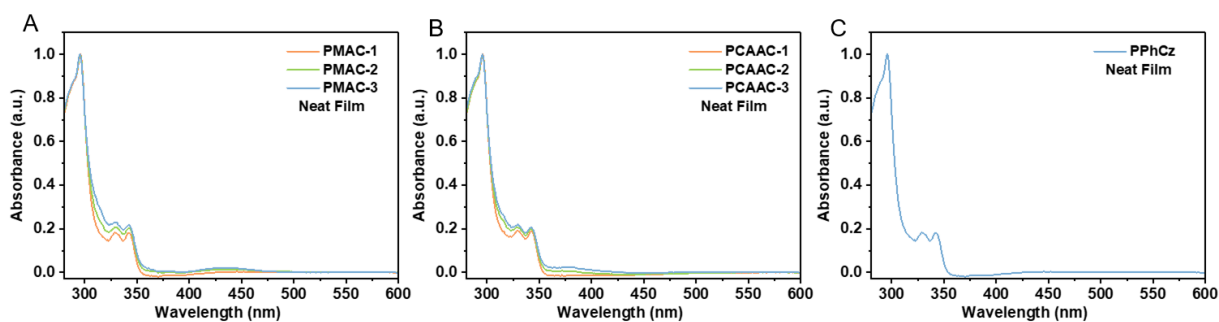

**Fig. S9** Normalized absorption spectra of (A) PMAC-x, (B) PCAAC-x, and (C) PPhCz in neat films.

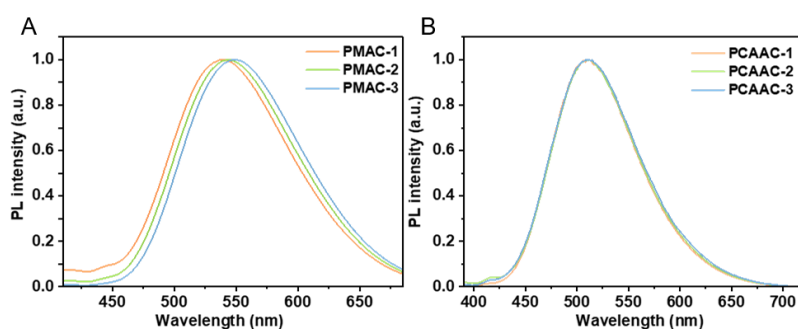

**Fig. S10** PL spectra of (A) PMAC-x under 400 nm excitation and (B) PCAAC-x under 370 nm excitation in toluene solutions ( $1 \times 10^{-4}$  M, 300 K).

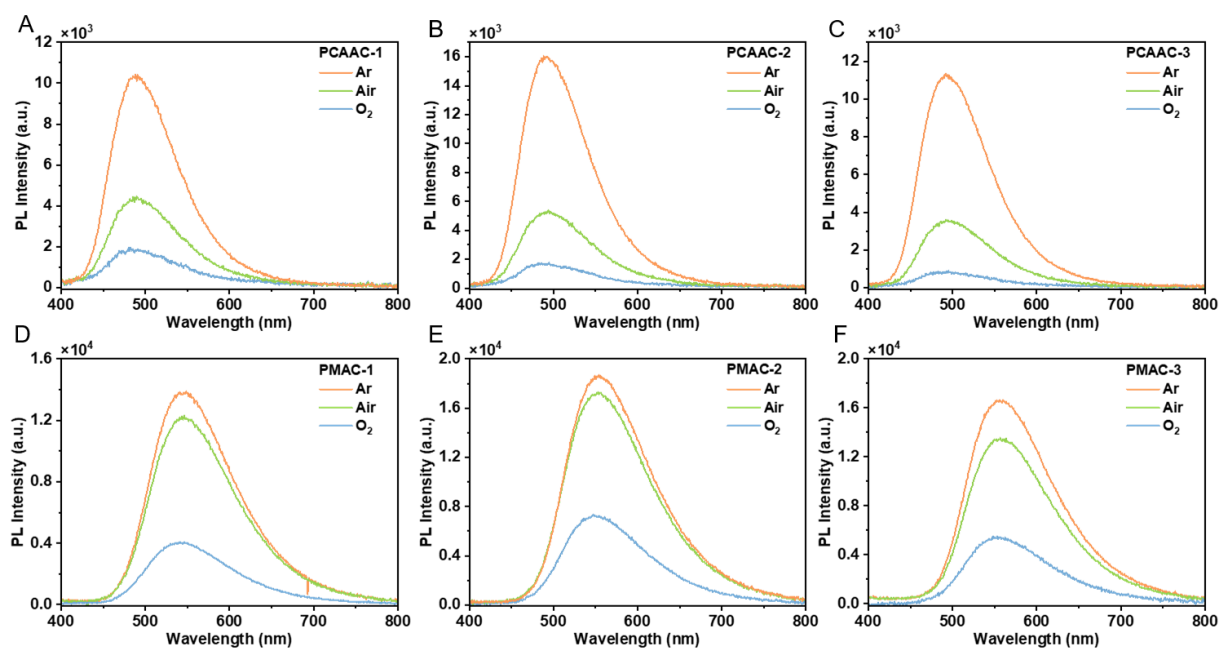

**Fig. S11** PL spectra of Cu(I) polymers in neat films measured under Ar, Air and O<sub>2</sub> conditions, following 300 nm excitation.

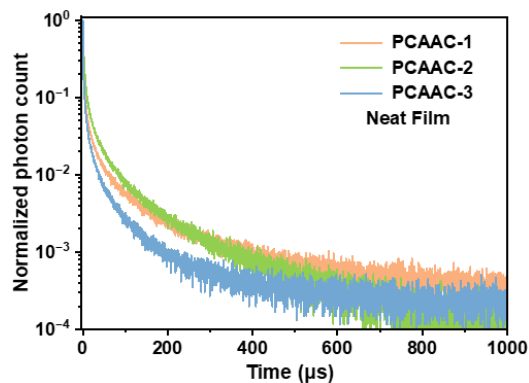

**Fig. S12** Transient PL decay curves of **PCAAC-x** in neat films at 300 K, following excitation of 375 nm.

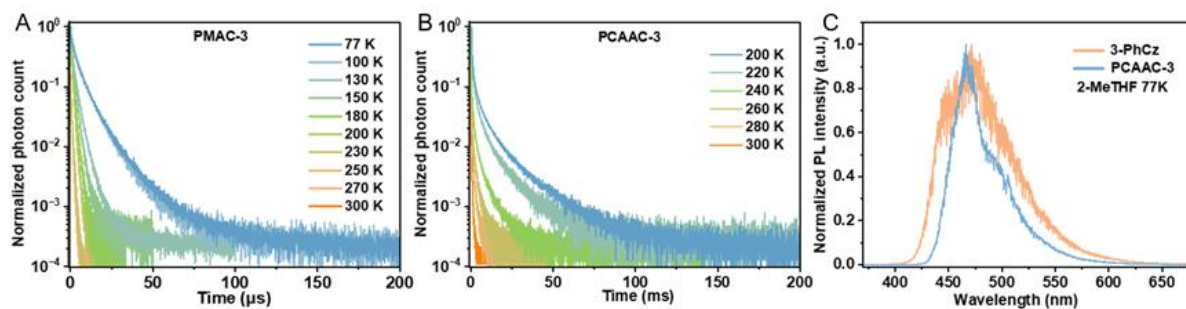

**Fig. S13** Transient PL spectra of (A) **PMAC-3** and (B) **PCAAC-3** in neat films from 77 to 300 K, following excitation of 375 nm. (C) Normalized phosphorescence spectra of **PCAAC-3** and 3-PhCz in the 2-MeTHF ( $10^{-4}$  M, 77 K), following excitation of 350 nm.

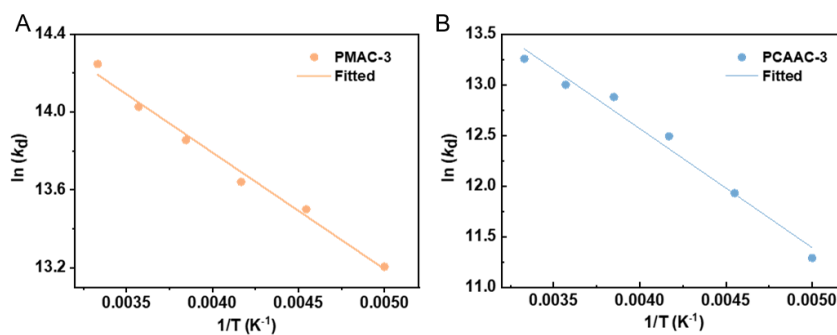

**Fig. S14** Fit to the temperature-dependent lifetimes from 200 to 300 K (symbols) to eq. S2 (line) for (A) **PMAC-3** and (B) **PCAAC-3**.

**Table S2.** Radiative decay lifetimes of **PMAC-3** at different temperatures.

| Temperature [K] | $\tau_1$ [ns] | $I_1$ | $\tau_2$ [ns] | $I_2$ | $\tau_3$ [ $\mu$ s] | $I_3$ | $\tau_{ave}$ [ $\mu$ s] |
|-----------------|---------------|-------|---------------|-------|---------------------|-------|-------------------------|
| 77              | 1540          | 0.07  | 8710          | 0.53  | 22.8                | 0.40  | 13.91                   |
| 100             | 1420          | 0.08  | 6830          | 0.62  | 18.00               | 0.30  | 9.81                    |
| 130             | 194           | 0.01  | 2350          | 0.42  | 6.04                | 0.57  | 4.42                    |
| 150             | 535           | 0.03  | 2520          | 0.53  | 5.62                | 0.44  | 3.81                    |
| 180             | 900           | 0.17  | 2300          | 0.75  | 6.80                | 0.08  | 2.43                    |
| 200             | 1094          | 0.44  | 2371          | 0.56  |                     |       | 1.84                    |
| 220             | 897           | 0.50  | 1854          | 0.50  |                     |       | 1.37                    |
| 240             | 779           | 0.47  | 1552          | 0.53  |                     |       | 1.19                    |
| 260             | 636           | 0.45  | 1128          | 0.55  |                     |       | 0.96                    |
| 280             | 502           | 0.33  | 959           | 0.67  |                     |       | 0.81                    |
| 300             | 380           | 0.34  | 797           | 0.66  |                     |       | 0.66                    |

**Table S3.** Radiative decay lifetimes of **PCAAC-3** at different temperatures.

| Temperature [K] | $\tau_1$ [ $\mu$ s] | $I_1$ | $\tau_2$ [ $\mu$ s] | $I_2$ | $\tau_3$ [ $\mu$ s] | $I_3$ | $\tau_4$ [ $\mu$ s] | $I_4$ | $\tau_{ave}$ [ms] |
|-----------------|---------------------|-------|---------------------|-------|---------------------|-------|---------------------|-------|-------------------|
| 77              | 129                 | 0.03  | 1530                | 0.14  | 7440                | 0.46  | 23800               | 0.37  | 12.45             |
| 100             | 120                 | 0.03  | 1280                | 0.14  | 6700                | 0.45  | 21800               | 0.38  | 11.49             |
| 120             | 110                 | 0.04  | 1140                | 0.17  | 6100                | 0.45  | 20500               | 0.34  | 9.94              |
| 140             | 53                  | 0.05  | 520                 | 0.13  | 3700                | 0.37  | 15300               | 0.45  | 8.28              |
| 160             | 24                  | 0.05  | 223                 | 0.14  | 1830                | 0.29  | 9990                | 0.52  | 5.77              |
| 180             | 22.8                | 0.06  | 201                 | 0.18  | 1600                | 0.32  | 9040                | 0.44  | 4.54              |
| 200             | 12.5                | 0.09  | 105                 | 0.21  | 746                 | 0.31  | 4690                | 0.39  | 2.10              |
| 220             | 6.59                | 0.10  | 47.8                | 0.24  | 318                 | 0.33  | 2127                | 0.33  | 0.82              |
| 240             | 3.76                | 0.12  | 22.9                | 0.23  | 131                 | 0.32  | 754                 | 0.33  | 0.30              |
| 260             | 2.55                | 0.10  | 12.2                | 0.24  | 65.3                | 0.33  | 349                 | 0.33  | 0.14              |
| 280             | 2.26                | 0.11  | 12.1                | 0.24  | 47.9                | 0.33  | 206                 | 0.32  | 0.08              |
| 300             | 1.75                | 0.10  | 7.78                | 0.27  | 35.9                | 0.37  | 156                 | 0.26  | 0.05              |

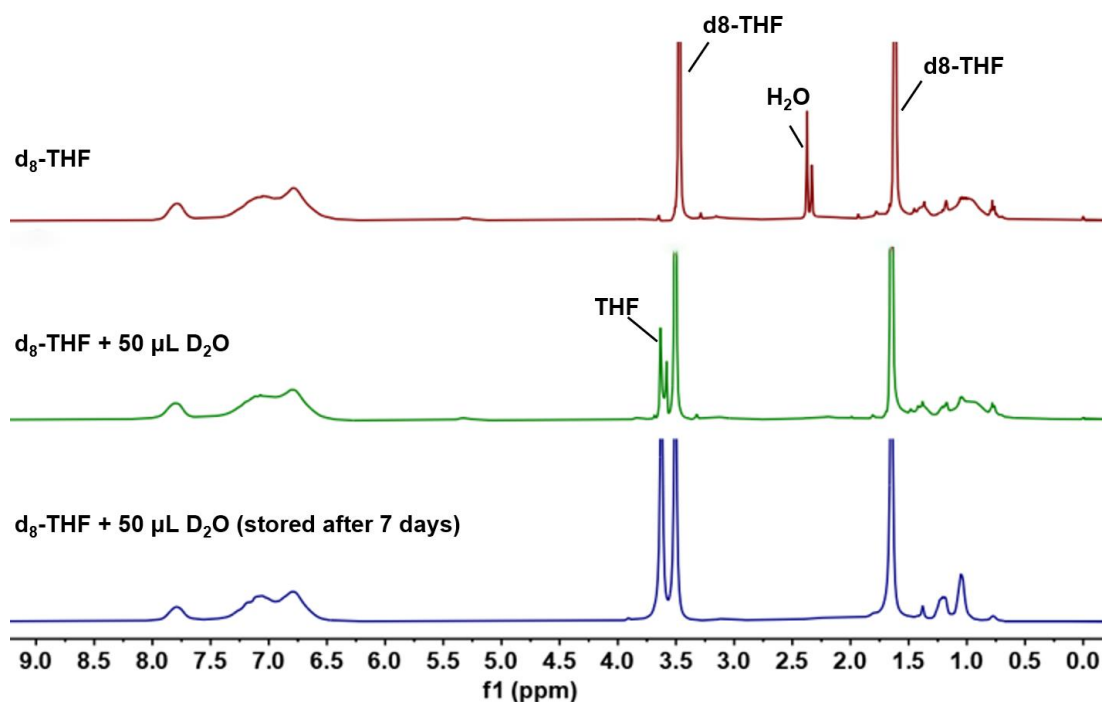

**Fig. S15**  $^1\text{H}$  NMR spectra of **PMAC-3** in the  $\text{d}_8\text{-THF}$ , and the **PMAC-3** with 10% (v: v)  $\text{D}_2\text{O}$  (the volume of the  $\text{d}_8\text{-THF}$  was 0.5 mL) and the sample stored after 7 days.

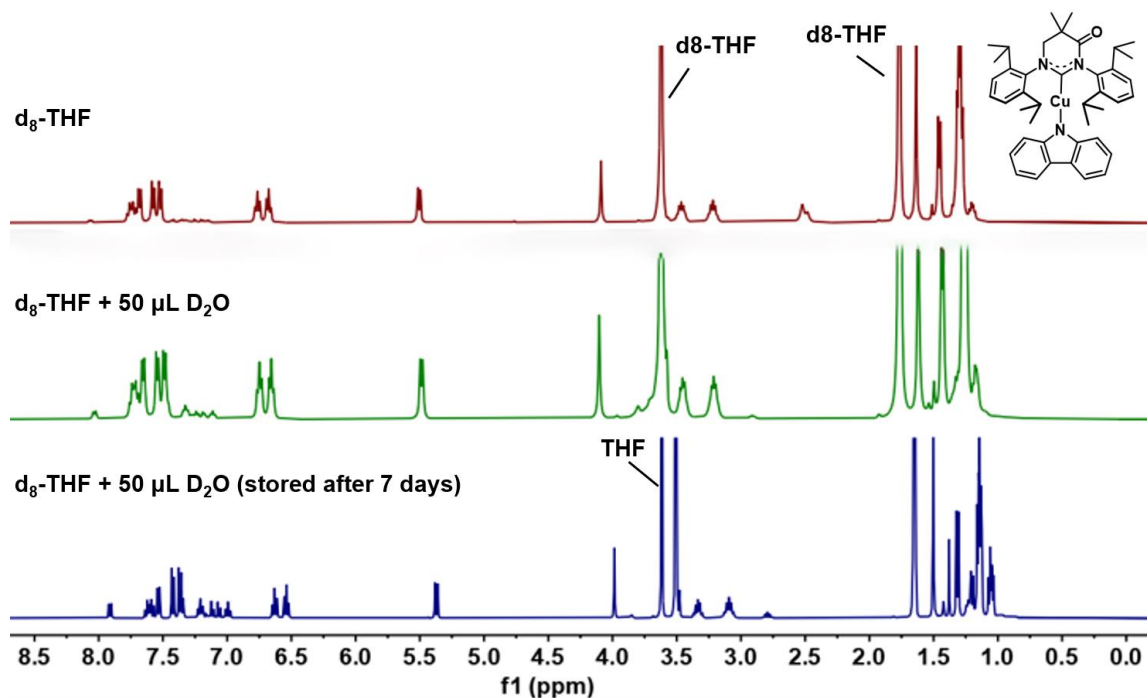

**Fig. S16**  $^1\text{H}$  NMR spectra of **MAC-Cu-Cz** complex in the  $\text{d}_8\text{-THF}$ , and the **MAC-Cu-Cz** with 10% (v: v)  $\text{D}_2\text{O}$  (the volume of the  $\text{d}_8\text{-THF}$  was 0.5 mL) and the sample stored after 7 days.



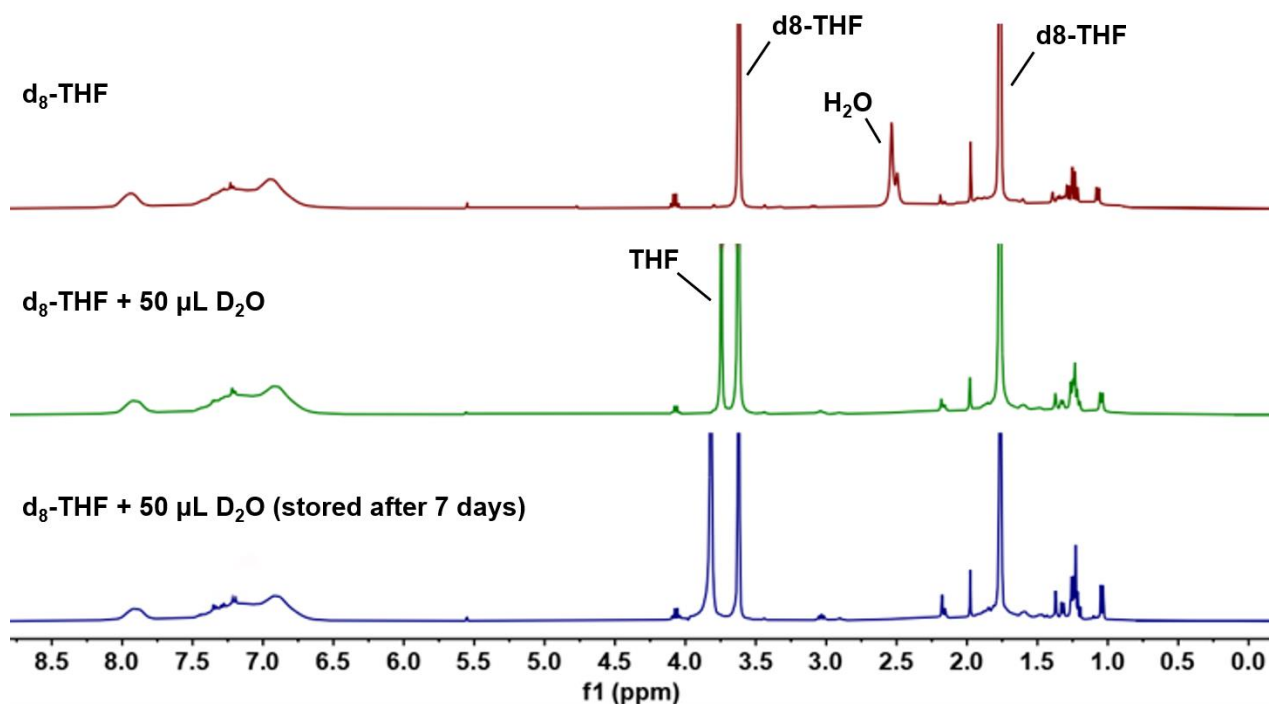

**Fig. S17**  $^1\text{H}$  NMR spectra of PCAAC-3 in the  $\text{d}_8$ -THF, and the PCAAC-3 with 10% (v: v)  $\text{D}_2\text{O}$  (the volume of the  $\text{d}_8$ -THF was 0.5 mL) and the sample stored after 7 days.

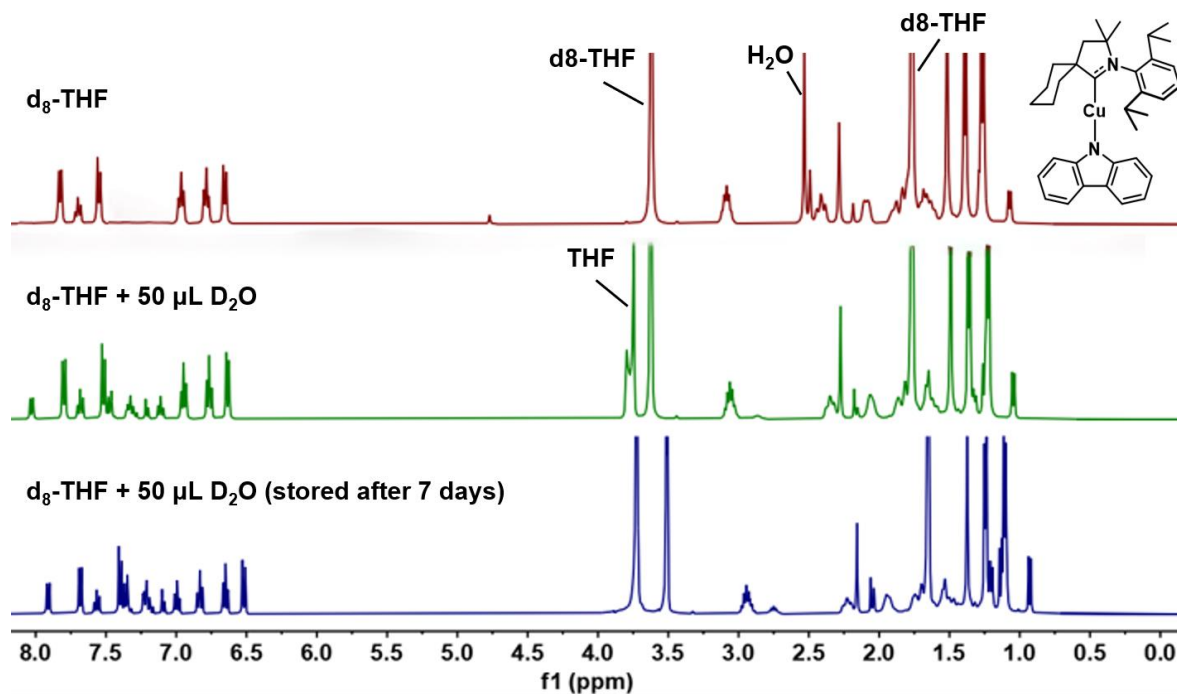

**Fig. S18**  $^1\text{H}$  NMR spectra of CAAC-Cu-Cz complex in the  $\text{d}_8$ -THF, and the CAAC-Cu-Cz with 10% (v: v)  $\text{D}_2\text{O}$  (the volume of the  $\text{d}_8$ -THF was 0.5 mL) and the sample stored after 7 days.

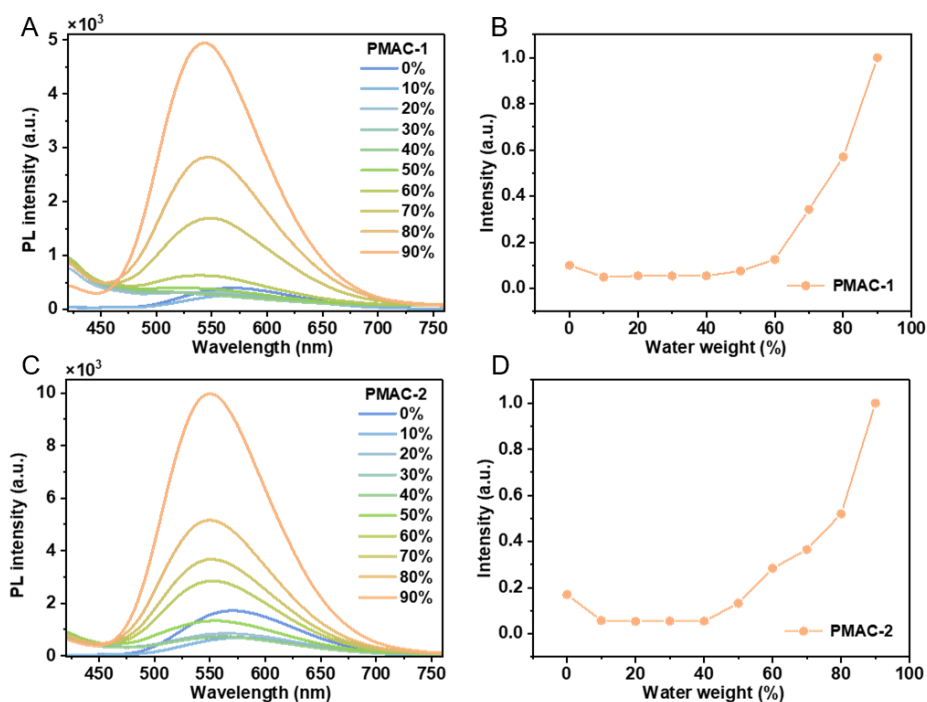

Fig. S19 (A) PMAC-1 and (C) PMAC-2 in THF/water mixtures with different water fraction ( $f_w$ ). Emission intensity vs.  $f_w$  of (B) PMAC-1 and (D) PMAC-2.

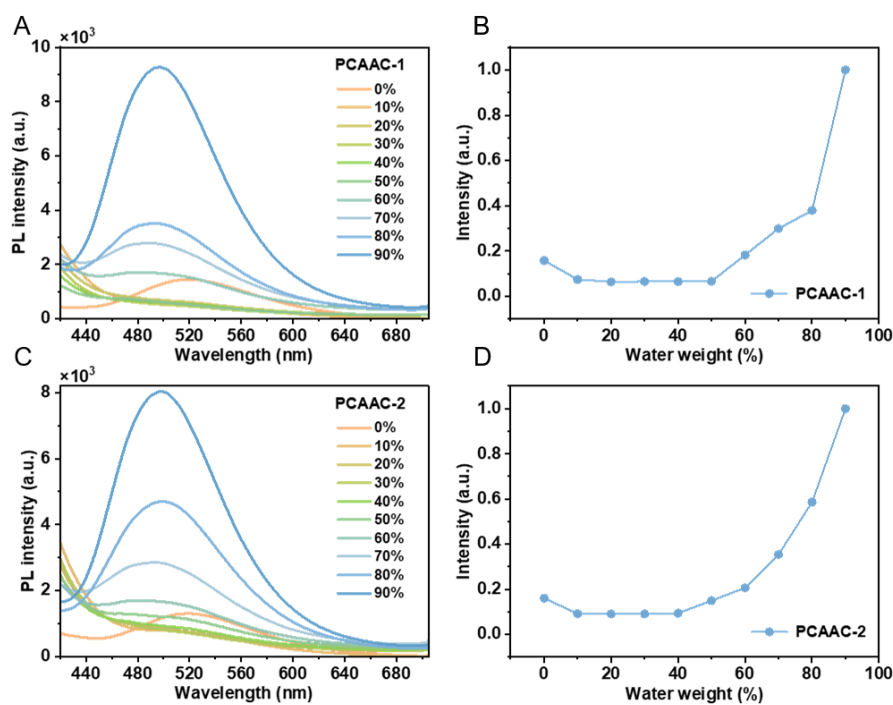

Fig. S20 (A) PCAAC-1 and (C) PCAAC-2 in THF/water mixtures with different water fraction ( $f_w$ ). Emission intensity vs.  $f_w$  of (B) PCAAC-1 and (D) PCAAC-2.

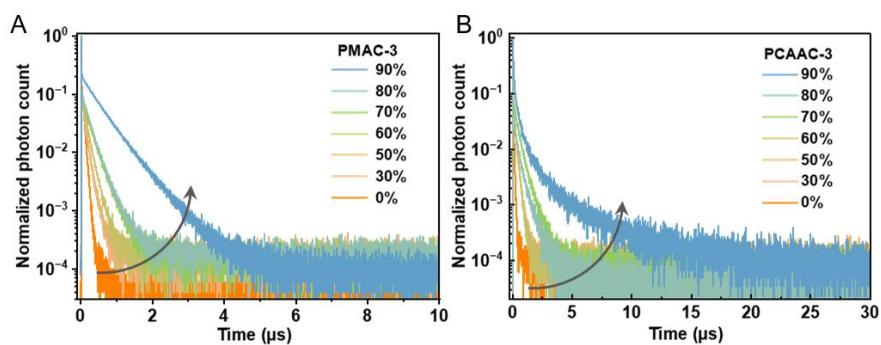

**Fig. S21** Normalized transient PL spectra of (A) **PMAC-3** and (B) **PCAAC-3** in the different water fraction ( $f_w$ ) at 300 K, following excitation of 375 nm.

**Table S4.** Lifetimes of PMAC-3 and PCAAC-3 in THF/water mixtures with different water fraction.

| $f_w$ | lifetime [ns] @PMAC-3 | lifetime [ $\mu$ s] @PMAC-3 |
|-------|-----------------------|-----------------------------|
| 0%    | 54                    | 0.05                        |
| 30%   | 105                   | 0.13                        |
| 50%   | 137                   | 0.19                        |
| 60%   | 143                   | 0.25                        |
| 70%   | 225                   | 0.48                        |
| 80%   | 253                   | 1.12                        |
| 90%   | 508                   | 2.70                        |

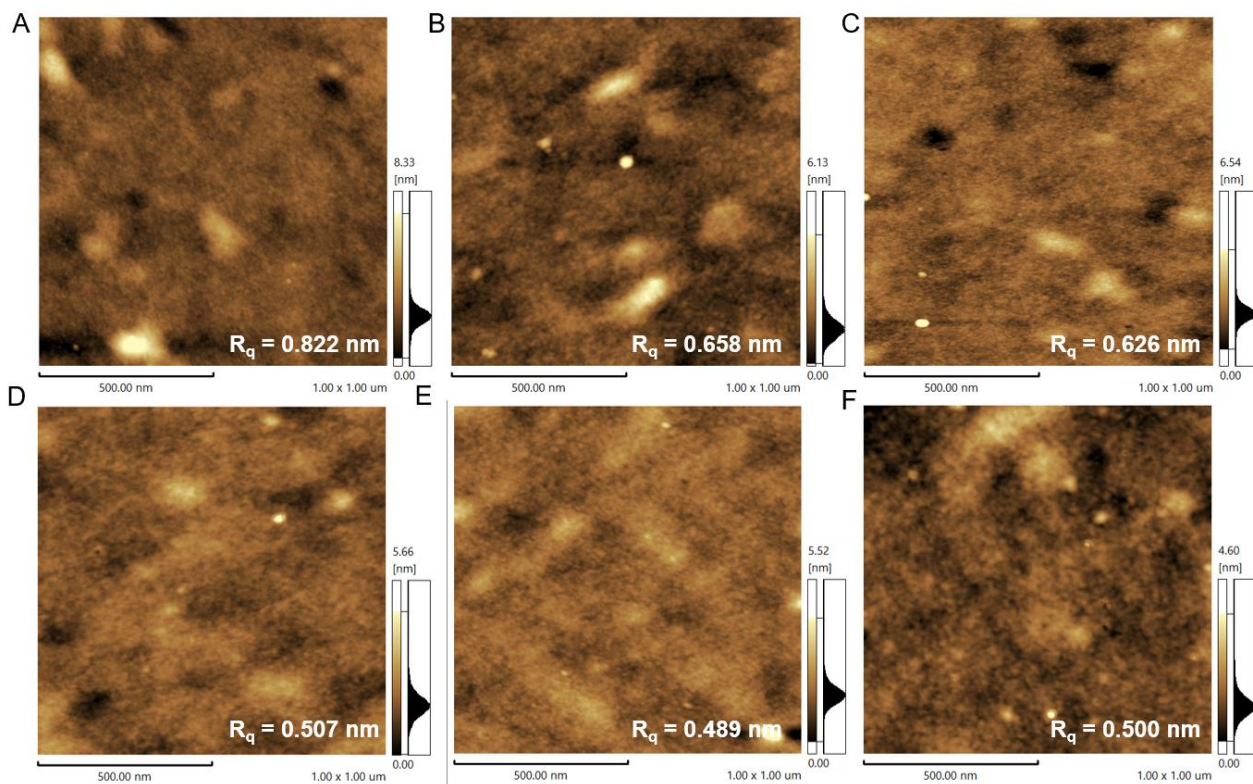

**Fig. S22** Atom force microscopy (AFM) images of neat films for (A) PMAC-1, (B) PMAC-2, (C) PMAC-3, (D) PCAAC-1, (E) PCAAC-2 and (F) PCAAC-3.

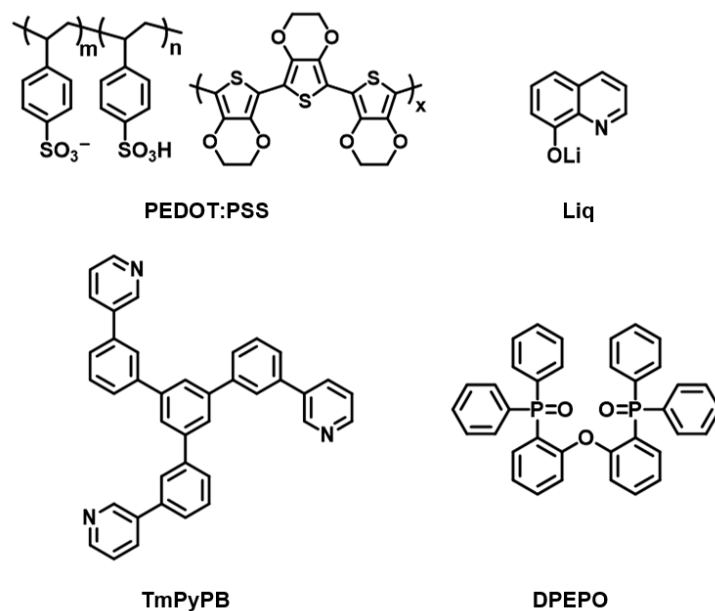

**Fig. S23** Molecular structures of the materials used in the devices.

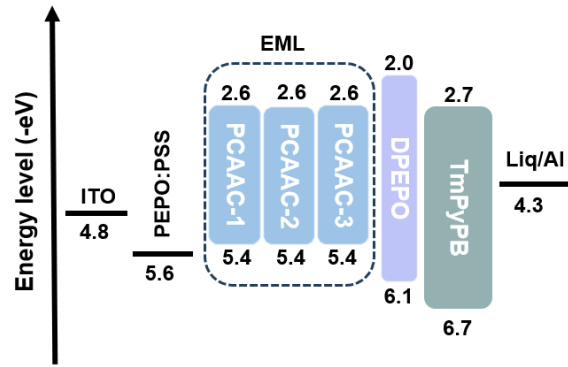

Fig. S24 Device structure and energy level diagram of device 4-6.

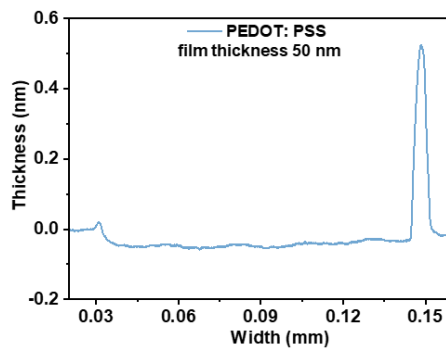

Fig. S25 The thickness of hole-injection layer (PEDOT: PSS).

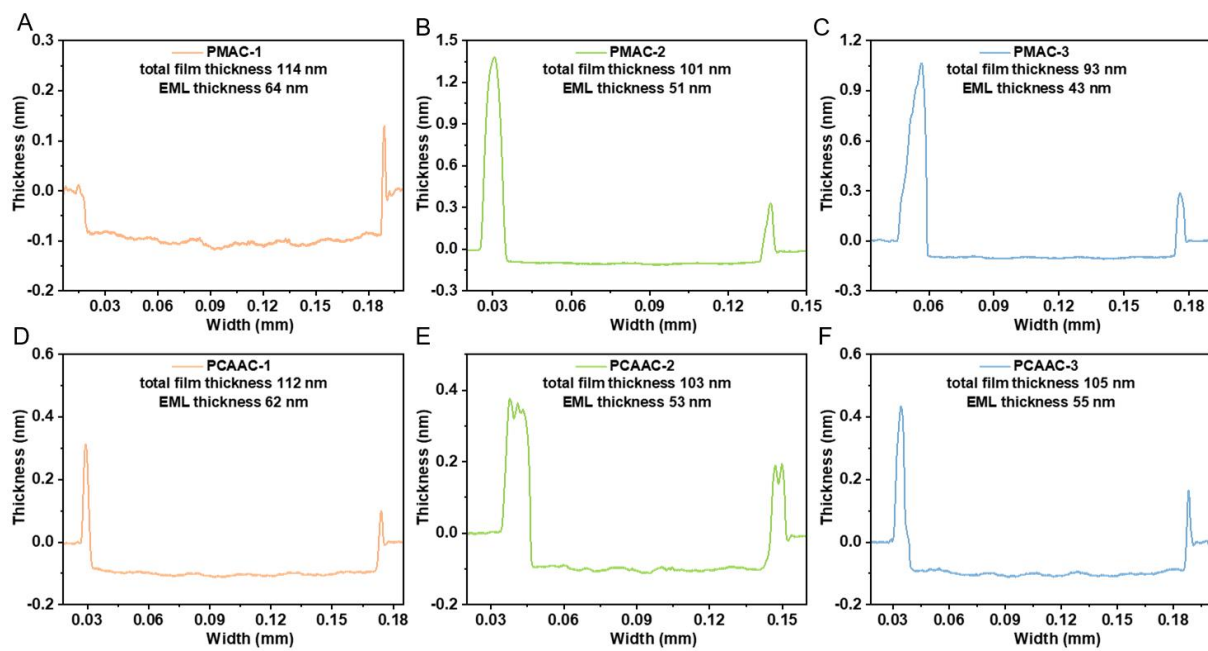

**Fig. S26** The thickness of the emissive layers based on all the Cu(I) polymers.

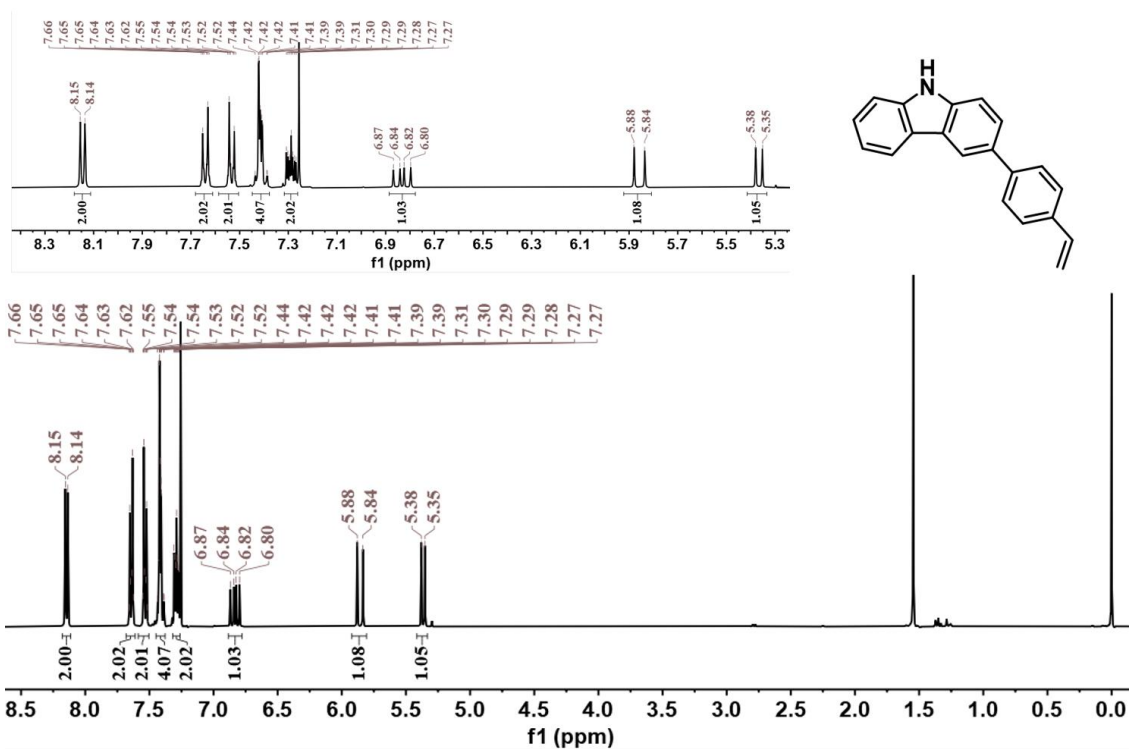

Fig. S27 <sup>1</sup>H NMR spectrum of 3-(4-vinylphenyl)-9H-carbazole (400 MHz, CDCl<sub>3</sub> + TMS, 300 K).

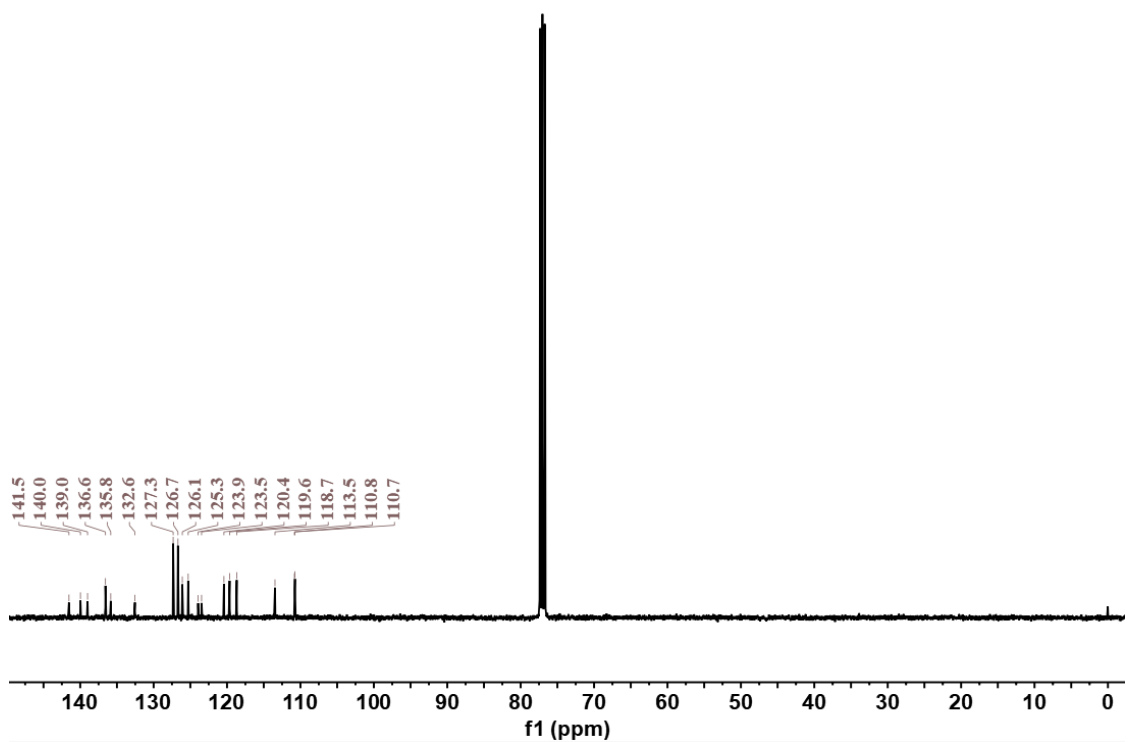

Fig. S28 <sup>13</sup>C NMR spectrum of 3-(4-vinylphenyl)-9H-carbazole (101 MHz, CDCl<sub>3</sub> + TMS, 300 K).

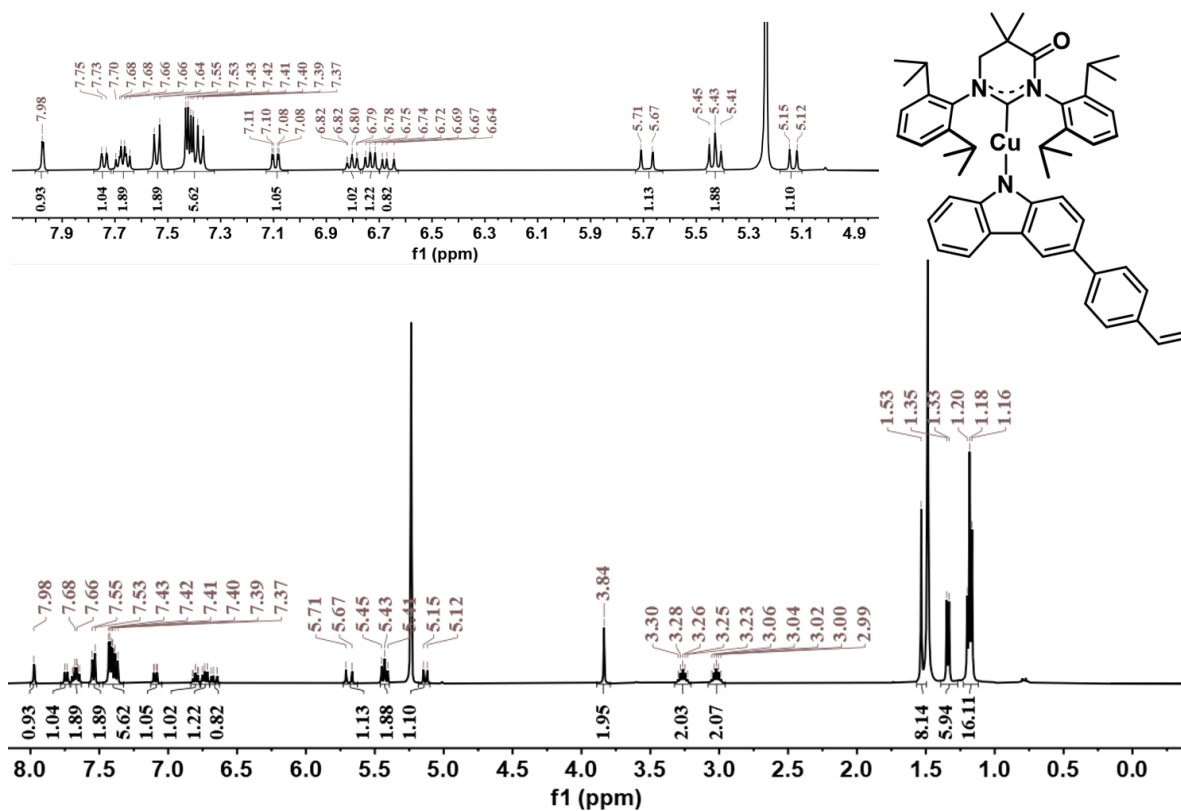

Fig. S29 <sup>1</sup>H NMR spectrum of MAC-Cu-PhCz monomer (400 MHz, CD<sub>2</sub>Cl<sub>2</sub> + TMS, 300 K).

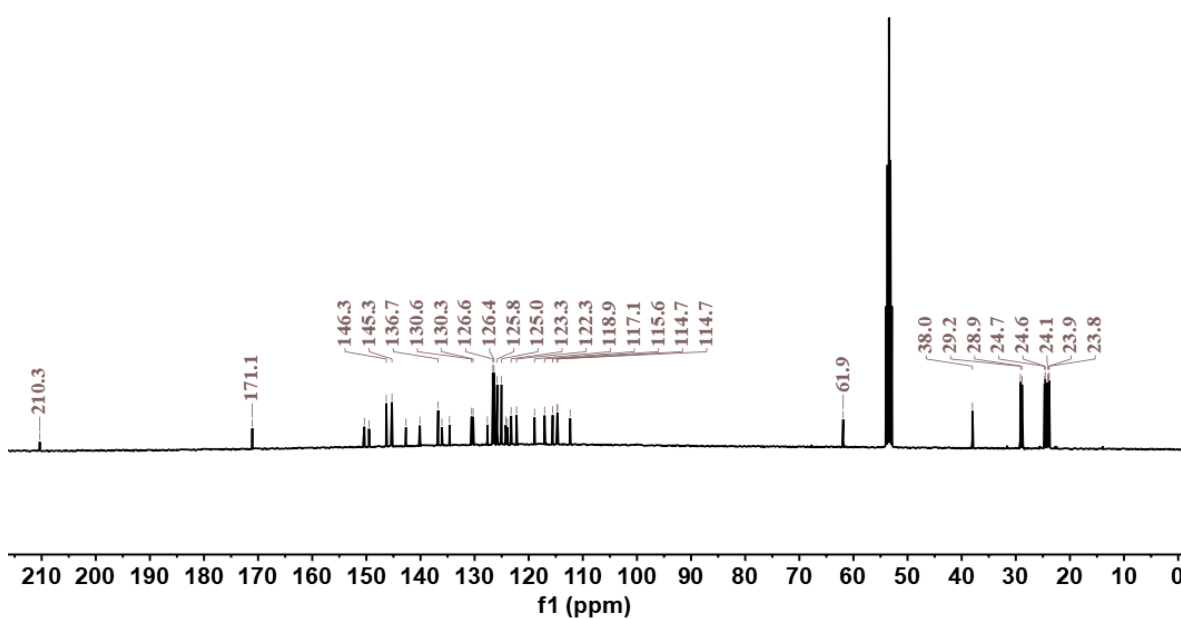

Fig. S30 <sup>13</sup>C NMR spectrum of MAC-Cu-PhCz monomer (101 MHz, CD<sub>2</sub>Cl<sub>2</sub> + TMS, 300 K).



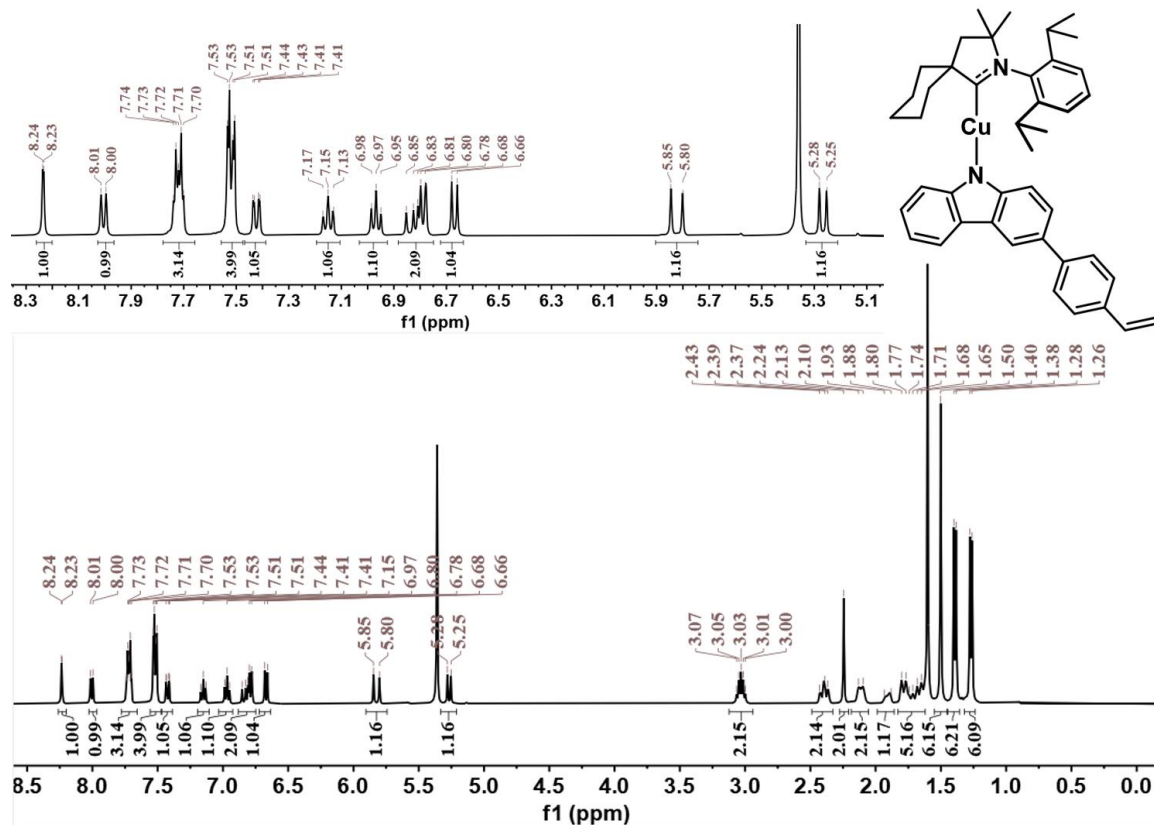

Fig. S31  $^1\text{H}$  NMR spectrum of CAAC-Cu-PhCz monomer (400 MHz,  $\text{CD}_2\text{Cl}_2$  + TMS, 300 K).

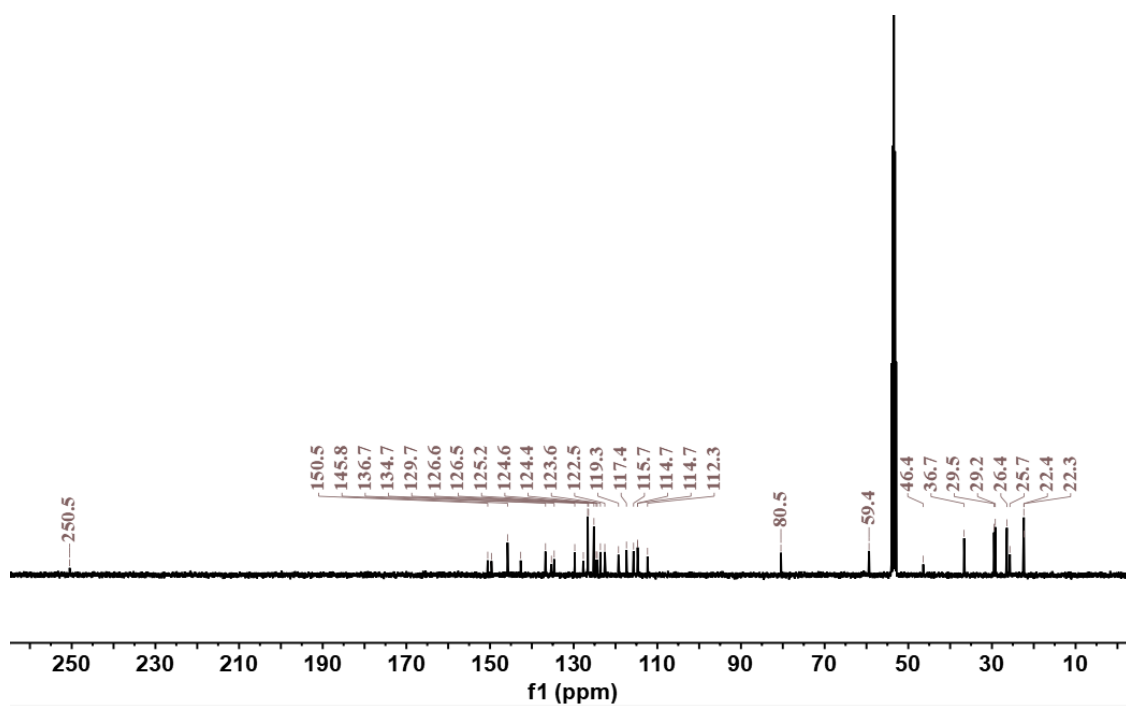

Fig. S32  $^{13}\text{C}$  NMR spectrum of CAAC-Cu-PhCz monomer (101 MHz,  $\text{CD}_2\text{Cl}_2$  + TMS, 300 K).

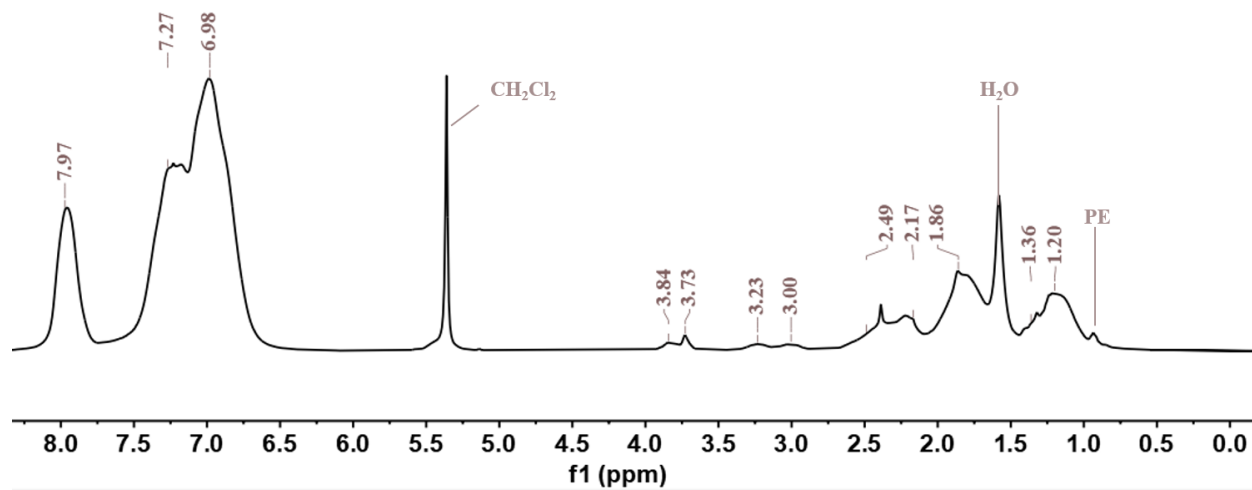

Fig. S33 <sup>1</sup>H NMR spectrum of PMAC-1 (400 MHz, CD<sub>2</sub>Cl<sub>2</sub> + TMS, 300 K).

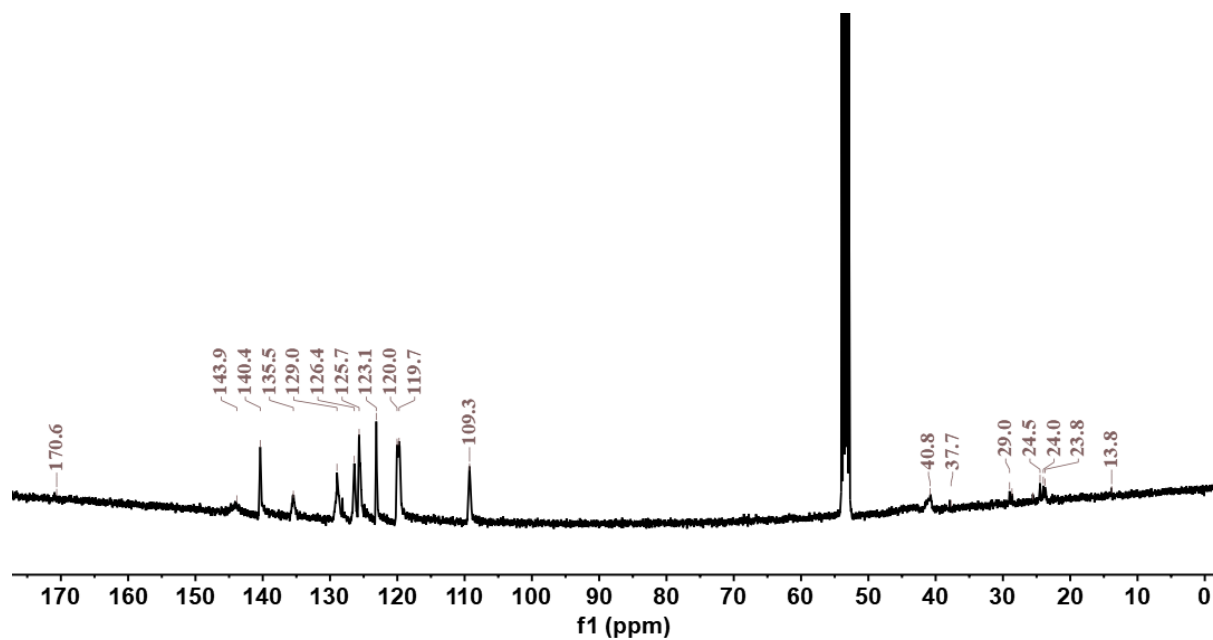

Fig. S34 <sup>13</sup>C NMR spectrum of PMAC-1 (101 MHz, CD<sub>2</sub>Cl<sub>2</sub> + TMS, 300 K).

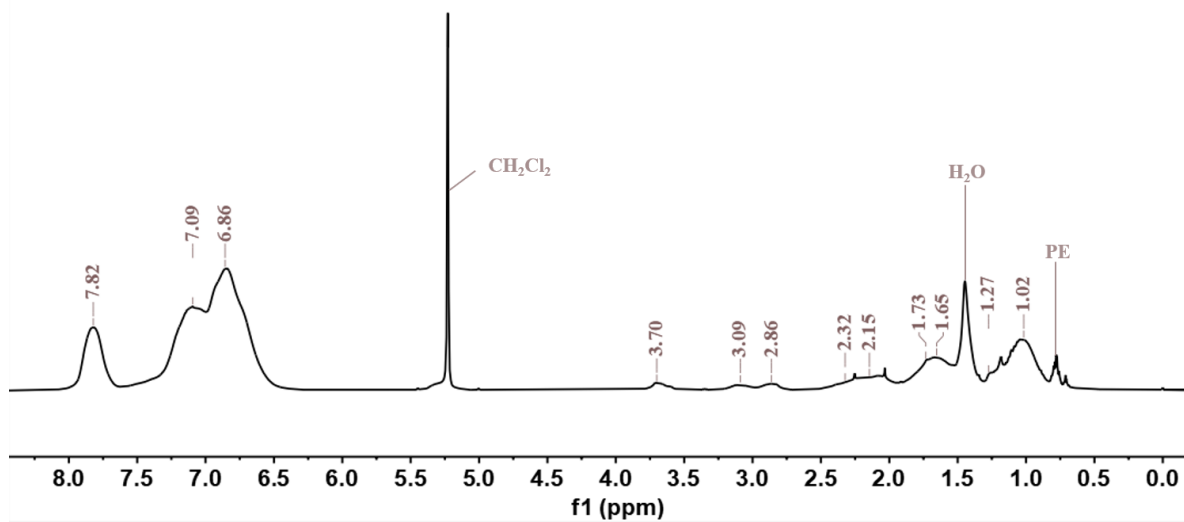

Fig. S35 <sup>1</sup>H NMR spectrum of PMAC-2 (400 MHz, CD<sub>2</sub>Cl<sub>2</sub> + TMS, 300 K).

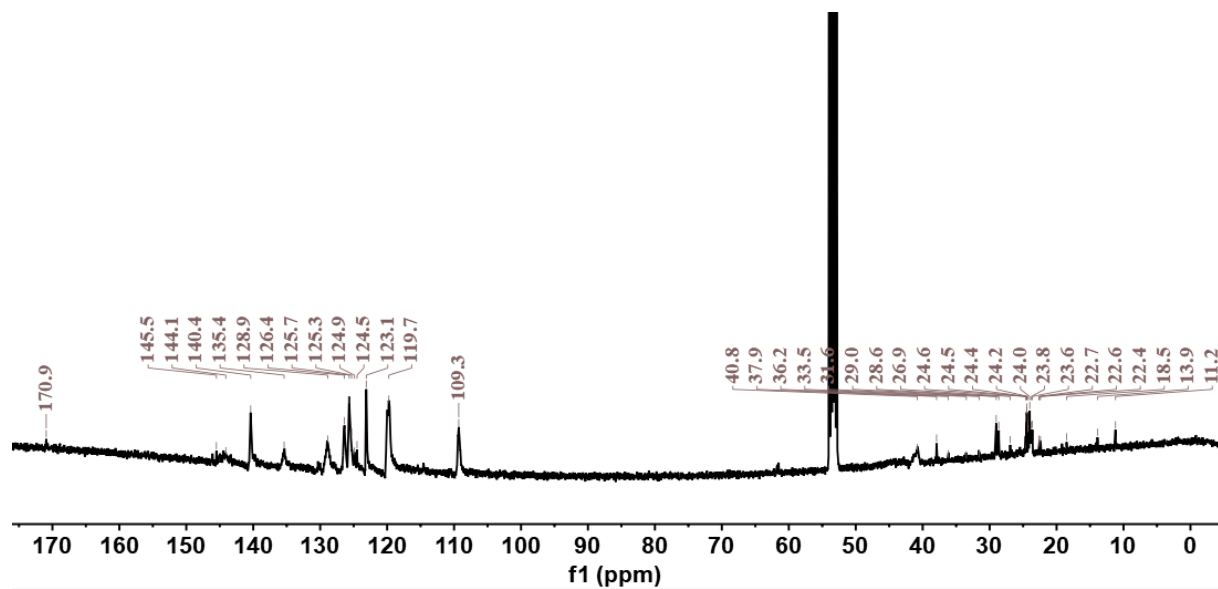

Fig. S36 <sup>13</sup>C NMR spectrum of PMAC-2 (101 MHz, CD<sub>2</sub>Cl<sub>2</sub> + TMS, 300 K).

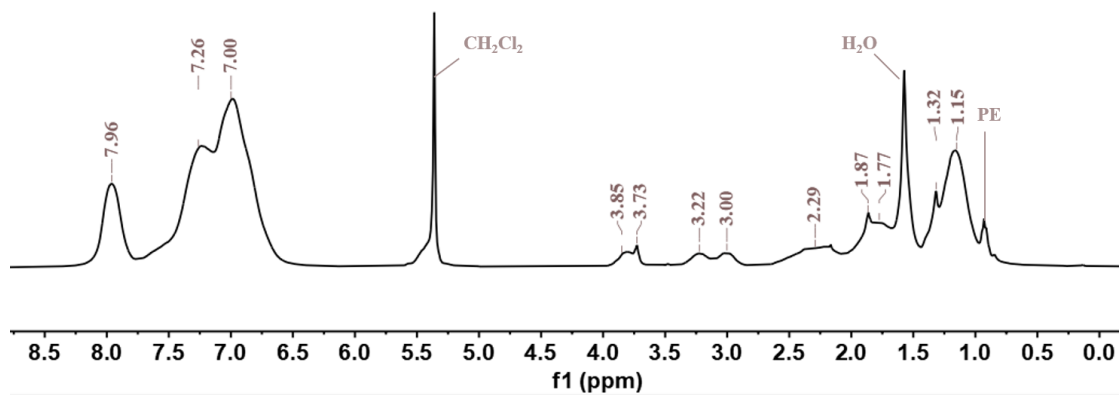

Fig. S37  $^1\text{H}$  NMR spectrum of **PMAC-3** (400 MHz,  $\text{CD}_2\text{Cl}_2$  + TMS, 300 K).

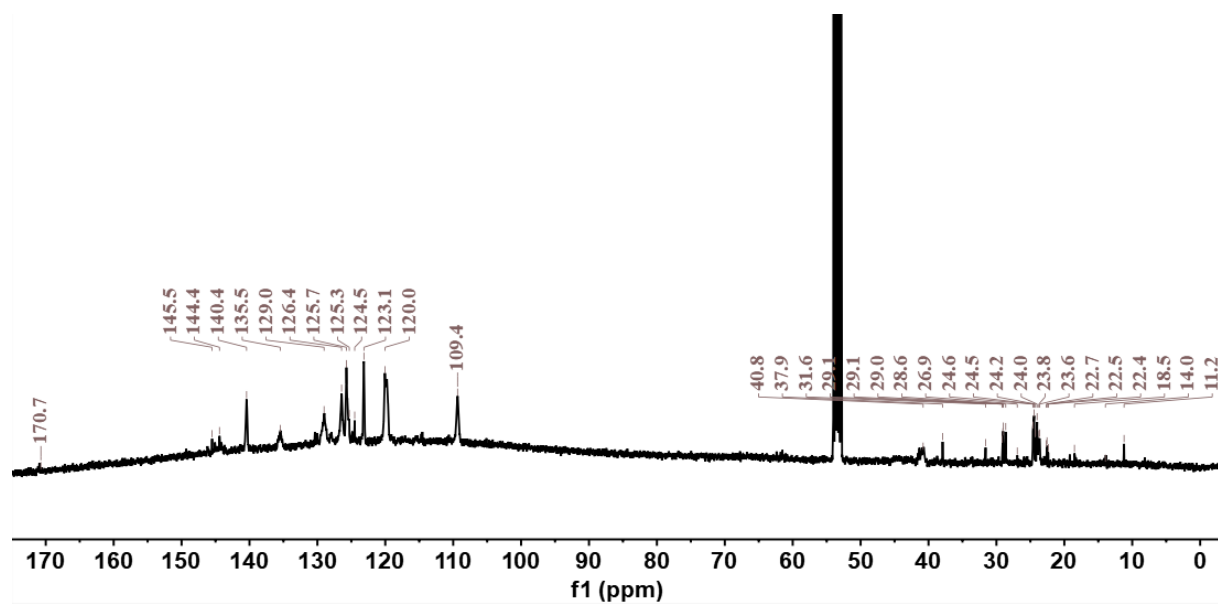

Fig. S38  $^{13}\text{C}$  NMR spectrum of **PMAC-3** (101 MHz,  $\text{CD}_2\text{Cl}_2$  + TMS, 300 K).

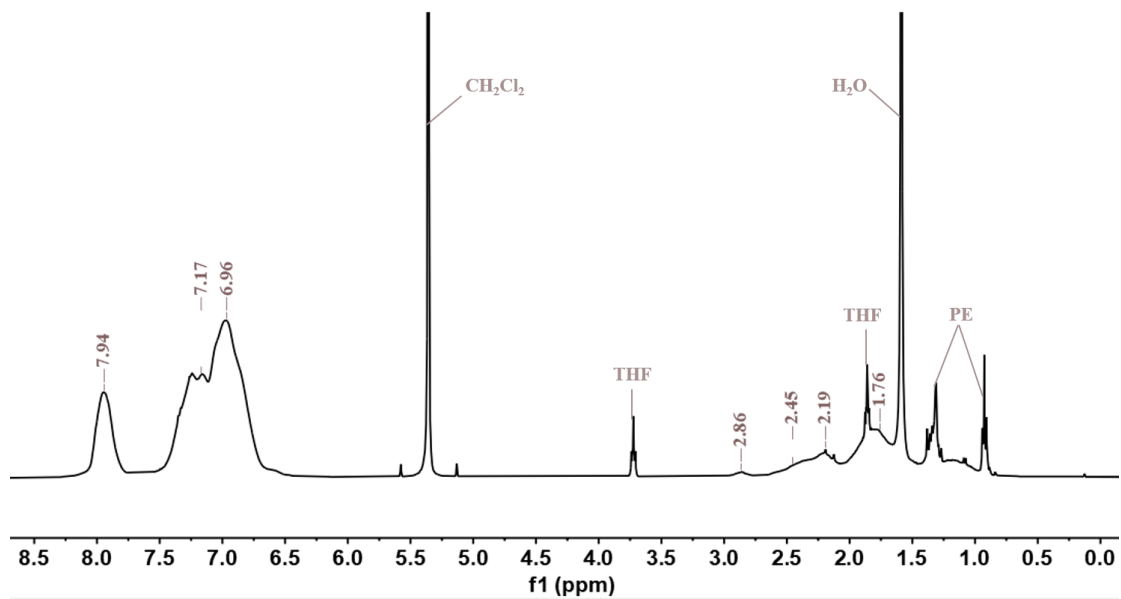

Fig. S39  $^1\text{H}$  NMR spectrum of PCAAC-1 (400 MHz,  $\text{CD}_2\text{Cl}_2$  + TMS, 300 K).

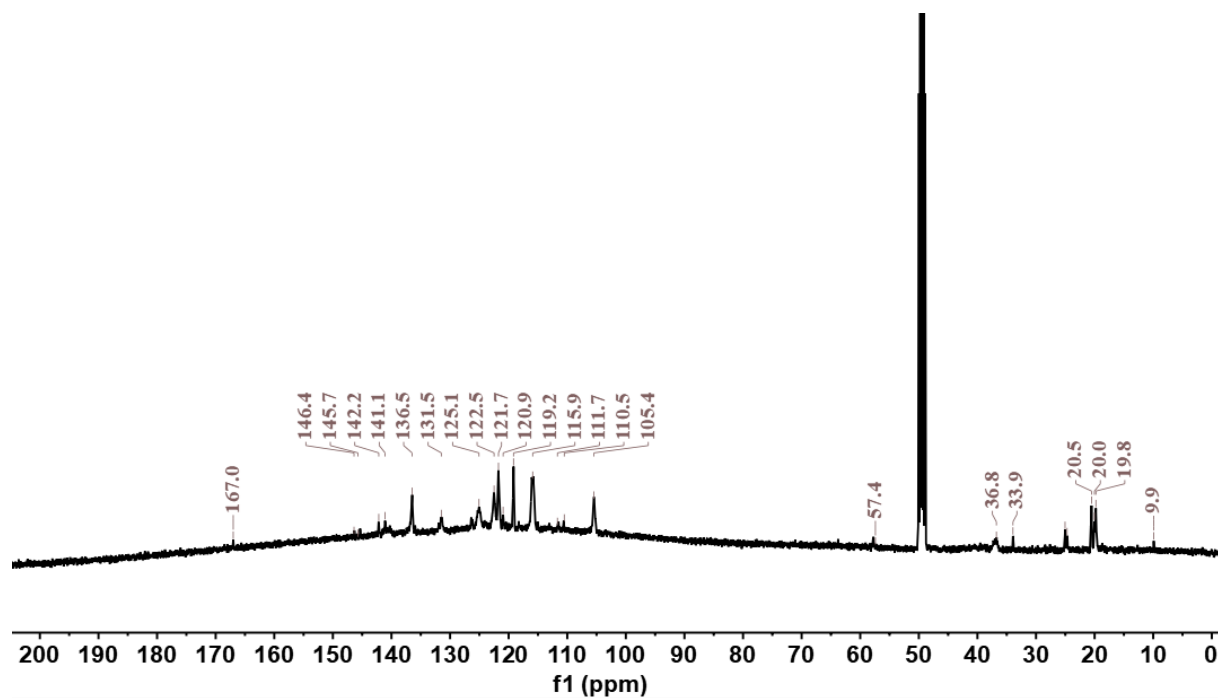

Fig. S40  $^{13}\text{C}$  NMR spectrum of PCAAC-1 (101 MHz,  $\text{CD}_2\text{Cl}_2$  + TMS, 300 K).

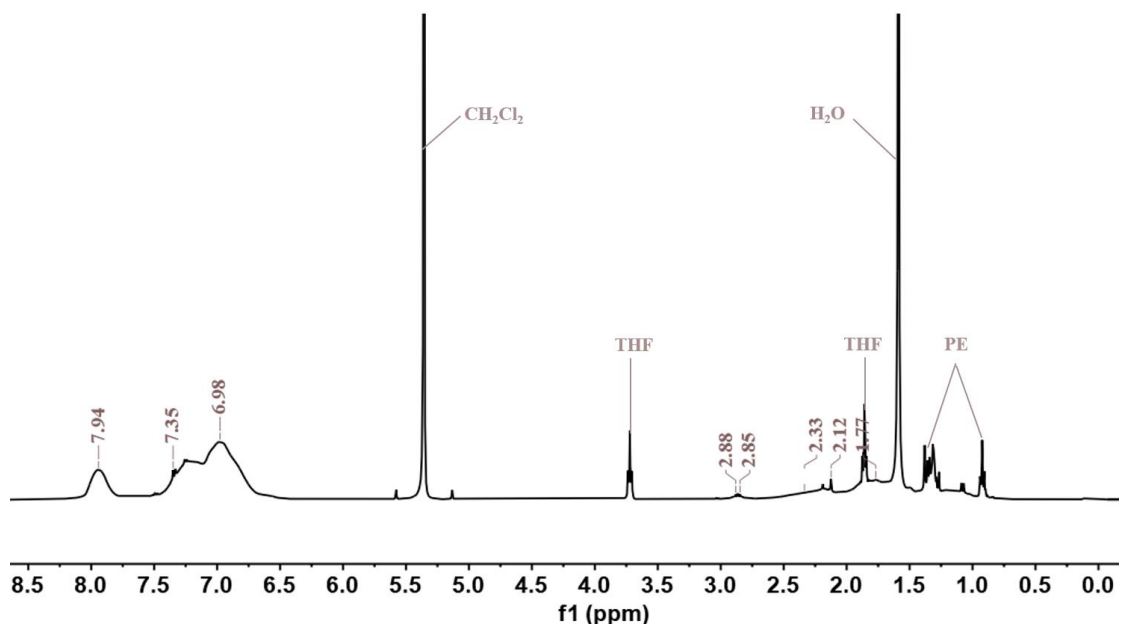

Fig. S41  $^1\text{H}$  NMR spectrum of PCAAC-2 (400 MHz,  $\text{CD}_2\text{Cl}_2$  + TMS, 300 K).

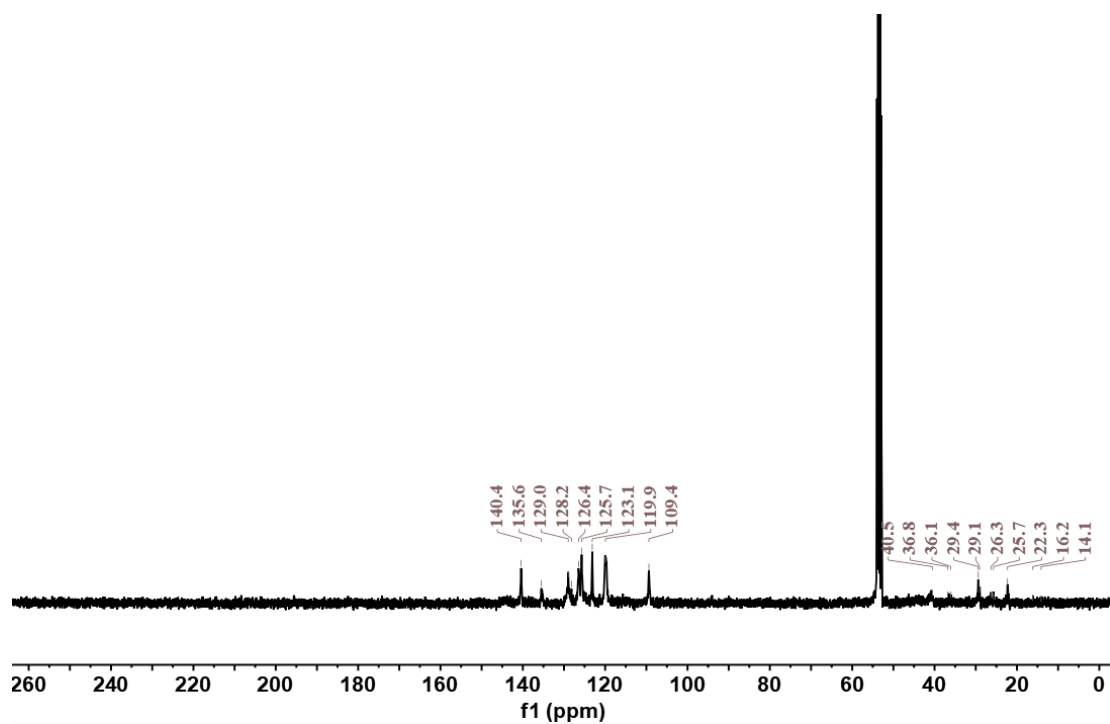

Fig. S42  $^{13}\text{C}$  NMR spectrum of PCAAC-2 (101 MHz,  $\text{CD}_2\text{Cl}_2$  + TMS, 300 K).

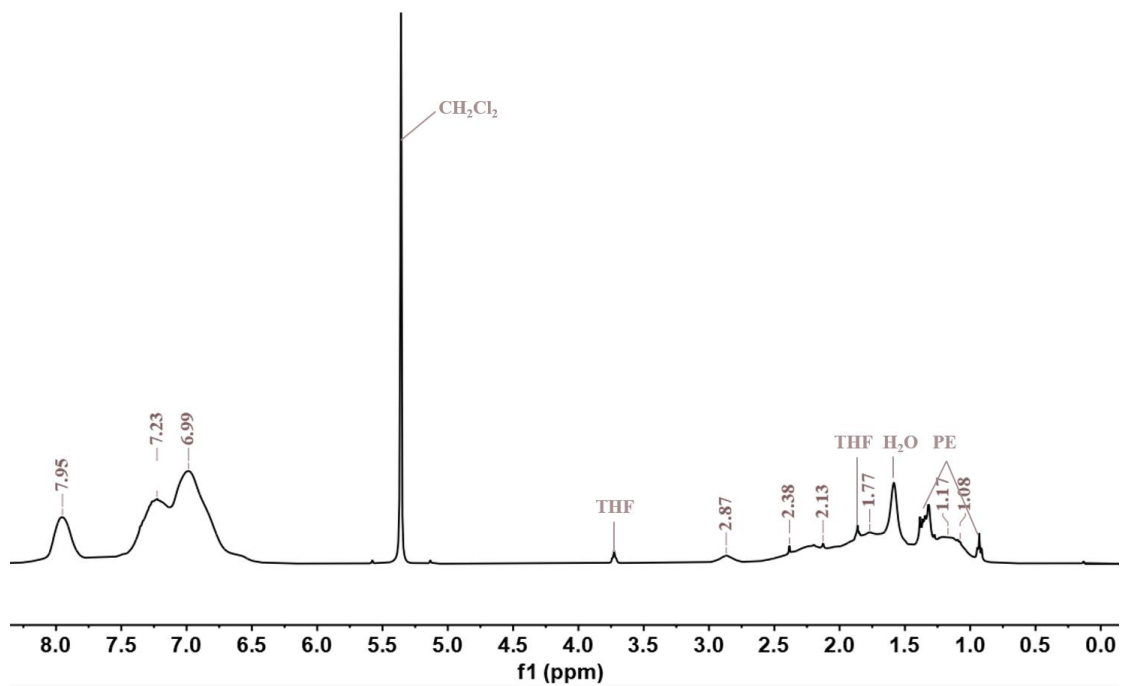

Fig. S43  $^1\text{H}$  NMR spectrum of PCAAC-3 (400 MHz,  $\text{CD}_2\text{Cl}_2$ + TMS, 300 K).

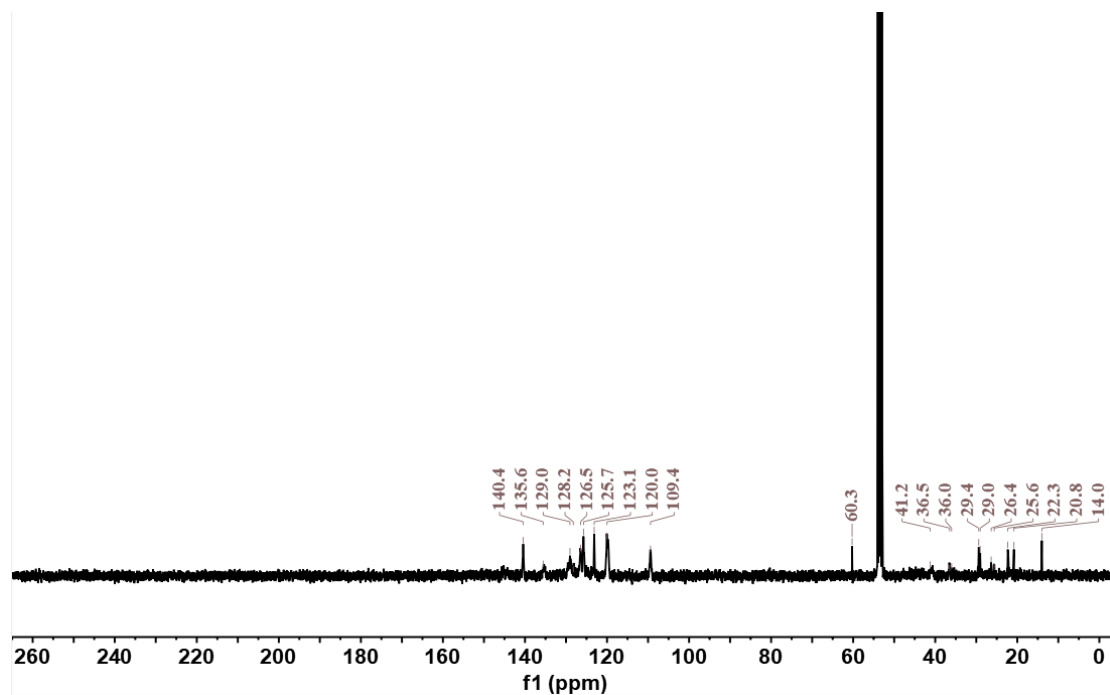

Fig. S44  $^{13}\text{C}$  NMR spectrum of PCAAC-3 (101 MHz,  $\text{CD}_2\text{Cl}_2$  + TMS, 300 K).

## References

1. S. Grimme, S. Ehrlich and L. Goerigk, *J. Comput. Chem.*, 2011, **32**, 1456–1465.
2. S. Grimme, J. Antony, S. Ehrlich and H. Krieg, *J. Chem. Phys.*, 2010, **132**, 154104.
3. T. Lu and F. Chen, *J. Comput. Chem.*, 2011, **33**, 580–592.
4. R. Hamze, S. Shi, S. C. Kapper, D. S. Muthiah Ravinson, L. Estergreen, M.-C. Jung, A. C. Tadle, R. Haiges, P. I. Djurovich, J. L. Peltier, R. Jazzar, G. Bertrand, S. E. Bradforth and M. E. Thompson, *J. Am. Chem. Soc.*, 2019, **141**, 8616–8626.
5. G. D. Frey, R. D. Dewhurst, S. Kousar, B. Donnadieu, G. Bertrand, *J. Organometal. Chem.* 2008, **693**, 1674–1682
6. S. Shi, M. C. Jung, C. Coburn, A. Tadle, D. Sylvinson M. R, P. I. Djurovich, S. R. Forrest, M. E. Thompson, *J. Am. Chem. Soc.* 2019, **141**, 3576–3588.
